# Supplementary material for: Patient safety culture and its determinants among healthcare professionals at a cluster hospital in Malaysia: a cross-sectional study
Source: PubMed Central journal article supplement — BMJ Open. 2022 Aug 22;12(8):e060546. doi: 10.1136/bmjopen-2021-060546 (PMC9403112; doi:10.1136/bmjopen-2021-060546), 2022-08-22
Supplement: bmjopen-2021-060546.draft_revisions.pdf [file bmjopen-2021-060546.draft_revisions.pdf]

# BMJ Open

BMJ Open is committed to open peer review. As part of this commitment we make the peer review history of every article we publish publicly available.

When an article is published we post the peer reviewers' comments and the authors' responses online. We also post the versions of the paper that were used during peer review. These are the versions that the peer review comments apply to.

The versions of the paper that follow are the versions that were submitted during the peer review process. They are not the versions of record or the final published versions. They should not be cited or distributed as the published version of this manuscript.

BMJ Open is an open access journal and the full, final, typeset and author-corrected version of record of the manuscript is available on our site with no access controls, subscription charges or pay-per-view fees (<http://bmjopen.bmj.com>).

If you have any questions on BMJ Open's open peer review process please email [info.bmjopen@bmj.com](mailto:info.bmjopen@bmj.com)

# BMJ Open

## Patient Safety Culture and its Determinant among Healthcare Professionals at a Cluster Hospital in Malaysia

|                               |                                                                                                                                                                                                        |
|-------------------------------|--------------------------------------------------------------------------------------------------------------------------------------------------------------------------------------------------------|
| Journal:                      | <i>BMJ Open</i>                                                                                                                                                                                        |
| Manuscript ID                 | bmjopen-2021-060546                                                                                                                                                                                    |
| Article Type:                 | Original research                                                                                                                                                                                      |
| Date Submitted by the Author: | 04-Jan-2022                                                                                                                                                                                            |
| Complete List of Authors:     | Ismail, Aniza; UKMMC, Khalid, Siti Norhani Mazrah; Pusat Perubatan Universiti Kebangsaan Malaysia, DEPARTMENT OF COMMUNITY HEALTH;                                                                     |
| Keywords:                     | Health & safety < HEALTH SERVICES ADMINISTRATION & MANAGEMENT, Quality in health care < HEALTH SERVICES ADMINISTRATION & MANAGEMENT, Clinical governance < HEALTH SERVICES ADMINISTRATION & MANAGEMENT |
|                               |                                                                                                                                                                                                        |

SCHOLARONE™  
Manuscripts

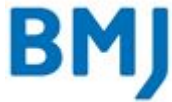

I, the Submitting Author has the right to grant and does grant on behalf of all authors of the Work (as defined in the below author licence), an exclusive licence and/or a non-exclusive licence for contributions from authors who are: i) UK Crown employees; ii) where BMJ has agreed a CC-BY licence shall apply, and/or iii) in accordance with the terms applicable for US Federal Government officers or employees acting as part of their official duties; on a worldwide, perpetual, irrevocable, royalty-free basis to BMJ Publishing Group Ltd ("BMJ") its licensees and where the relevant Journal is co-owned by BMJ to the co-owners of the Journal, to publish the Work in this journal and any other BMJ products and to exploit all rights, as set out in our [licence](#).

The Submitting Author accepts and understands that any supply made under these terms is made by BMJ to the Submitting Author unless you are acting as an employee on behalf of your employer or a postgraduate student of an affiliated institution which is paying any applicable article publishing charge ("APC") for Open Access articles. Where the Submitting Author wishes to make the Work available on an Open Access basis (and intends to pay the relevant APC), the terms of reuse of such Open Access shall be governed by a Creative Commons licence – details of these licences and which [Creative Commons](#) licence will apply to this Work are set out in our licence referred to above.

Other than as permitted in any relevant BMJ Author's Self Archiving Policies, I confirm this Work has not been accepted for publication elsewhere, is not being considered for publication elsewhere and does not duplicate material already published. I confirm all authors consent to publication of this Work and authorise the granting of this licence.

1  
2  
3 1 **Title of Manuscript: Patient Safety Culture and its Determinant among**  
4 2 **Healthcare Professionals at a Cluster Hospital in Malaysia**

5 3 **Corresponding author:** Aniza Ismail, Hospital Canselor Tuanku Muhriz UKM,  
6 4 Department of Community Health, Cheras, MY, [aniza@ppukm.ukm.edu.my](mailto:aniza@ppukm.ukm.edu.my) , 603 –  
7 5 9145 5887

8 6 **Co-author:** Siti Norhani Mazrah Khalid, Hospital Canselor Tuanku Muhriz UKM,  
9 7 Department of Community Health, Jalan Yaacob Latif, Bandar Tun Razak, Cheras,  
10 8 MY 56000

11 9 **Keywords:** Patient safety, safety culture, healthcare quality improvement, attitudes

12 10 **Word count (excluding title page, abstract, references, and tables):** 4448

13 11 **Acknowledgements:** We would like to express the gratitude to the Director General  
14 12 of Health Malaysia for his permission to publish this article, the Hospital Directors of  
15 13 the hospitals; Dr. Zaiton binti Udin, Dr. Farozy Faizah Fazil and Dr. Syed  
16 14 Satahkatullah for the opportunities to conduct this study at their centre.

15

16

1  
2  
3  
4 1 **Manuscript Type: Original Article**

5  
6  
7 2 **Title of Manuscript: Patient Safety Culture and its Determinants among**  
8 3 **Healthcare Professionals at a Malaysian Cluster Hospital.**

9  
10 4  
11  
12 5 **Abstract:**

13  
14  
15 6 **Objective:**

16  
17 7 To assess the level of patient safety culture among healthcare professionals at a  
18  
19 8 cluster hospital in Malaysia and to determine the predictive factors of positive patient  
20  
21 9 safety culture.

22  
23  
24  
25 10 **Methods:**

26  
27 11 This cross-sectional study was conducted at a cluster hospital comprising one state  
28  
29 12 and two district hospitals in Malaysia. The safety culture was assessed using the  
30  
31 13 Safety Attitude Questionnaire (SAQ), which is a validated questionnaire. Using  
32  
33 14 proportionate stratified random sampling, 1814 respondents were recruited, and we  
34  
35 15 used the independent t-test, Pearson chi-square test, and multiple logistic regression  
36  
37 16 analysis for data assessment.

38  
39 17 **Results:**

40  
41 18 Only 23.9% of the respondents had positive patient-safety culture levels (SAQ score  $\geq$   
42  
43 19 75%); the overall mean score was  $67.82 \pm 10.53$ . The job satisfaction dimension had  
44  
45 20 the highest percentage of positive responses (67.0%), with a mean score of  $76.54 \pm$   
46  
47 21  $17.77$ . The factors associated with positive patient-safety culture were age (odds ratio  
48  
49 22 (OR) 1.03,  $p < 0.001$ ), gender (OR 1.67,  $p = 0.001$ ), education level (OR 2.51,  $p <$   
50  
51 23  $0.001$ ), work station (OR 2.02,  $p < 0.001$ ), participation in patient safety training (OR  
52  
53 24 1.64,  $p = 0.007$ ), good perception of the incident reporting system (OR 1.71,  $p =$   
54  
55 25  $0.038$ ), and a non-blaming (OR 1.36,  $p = 0.013$ ) and instructive (OR 3.31,  $p = 0.007$ )  
56  
57 26 incident reporting system.

1  
2  
3 1 **Conclusions:**  
4

5 2 Healthcare professionals at the cluster hospital showed unsatisfactory patient-safety  
6 3 culture levels. Most of the respondents appreciated their jobs, despite experiencing  
7 4 dissatisfaction with their working conditions. The priority for changes should involve  
8 5 systematic interventions to focus on patient safety training, address the blame culture,  
9 6 improve communication, exchange information about errors, and improve working  
10 7 conditions.  
11 8

12 9 **Keywords:** patient safety culture; patient safety; safety attitude questionnaire; cluster  
13 10 hospital  
14 11

15 12 **Strengths and limitations of this study:**  
16 13

- 17 14 • This is the first study on patient safety culture among healthcare professionals  
18 15 conducted in our state. We believe our study's findings to provide a reasonably  
19 16 representative view of the patient safety culture that can be expected in the  
20 17 other two cluster hospitals in Kedah since the other two clusters' setting was  
21 18 identical to our cluster.
- 22 19 • Our study's response rate was good compared to most of the international  
23 20 studies, which could be an obvious indication of employee commitment and  
24 21 dedication to quality issues, all of which signify responsible conduct. It was  
25 22 also attributable partly to the administered questionnaire which has positive  
26 23 features, compared to other tools. Among those features are self-administered  
27 24 questionnaires with clear terms and limited number of items that only require a  
28 25 short time for respondents to complete.
- 29 26 • We didn't explore the connection between patient safety culture and the  
30 27 number of events reported by respondents and the patient outcome. Further  
31 28 research is required to identify the complicated relationship between patient  
32 29 safety culture and incident reporting system, the number of reporting and  
33 30 patient outcome, and how the data produced can be translated into action and  
34 31 learning. The findings are crucial and can guide us on interventions and  
35 32 improvements that can be taken to create a safe healthcare system and reduce  
36 33 adverse medical outcomes.  
37 34  
38 35  
39 36  
40 37  
41 38  
42 39  
43 40  
44 41  
45 42  
46 43  
47 44  
48 45  
49 46  
50 47  
51 48  
52 49  
53 50  
54 51  
55 52  
56 53  
57 54  
58 55  
59 56  
60 57

1  
2  
3  
4  
5  
6  
7  
8  
9  
10  
11  
12  
13  
14  
15  
16  
17  
18  
19  
20  
21  
22  
23  
24  
25  
26  
27  
28  
29  
30  
31  
32  
33  
34  
35  
36  
37  
38  
39  
40  
41  
42  
43  
44  
45  
46  
47  
48  
49  
50  
51  
52  
53  
54  
55  
56  
57  
58  
59  
60

- 1 • Although a useful tool, SAQ has its limitation in which it assesses staffs  
2 believe about safety culture rather than their real safety behaviour. It should be  
3 noted that SAQ tests the current attitude of patient safety, but there may be  
4 differences between attitudes and actual practice. Therefore, to explore the  
5 dimensions which influence patient safety in more detail, a combination of  
6 SAQ with qualitative methods such as peer observation, group discussions,  
7 analysis of organization's incident history, and audits of the safety  
8 management system is recommended and worth considering.
- 9 • There is still a wide gap in research about how data obtained from different  
10 methods are related and how to combine them to get a complete safety culture  
11 view. Despite these limitations, we believe this research offers useful insight  
12 into our organisation's baseline patient safety culture.

## 1 BACKGROUND

2 The healthcare system is extremely complex, wherein healthcare delivery is founded  
3 on patient safety. Patient safety entails avoiding preventable harm to patients during  
4 the health care process and reducing the risk of unnecessary injury associated with  
5 health care to an acceptable minimum. The World Health Organization (WHO)  
6 reports that approximately 1 in 10 patients are harmed while receiving health care,  
7 and approximately 43 million patient safety incidents occur annually.(1) Little can be  
8 accomplished if a patient feels, or is, unsafe when receiving medical treatment at  
9 healthcare facilities.(2) Thus, ensuring patient safety requires tremendous efforts from  
10 every member of a healthcare team.

11 The patient safety movement hit a milestone after the Institute of Medicine  
12 (IOM).(3) Since then, patient safety has been at the forefront of health care. In  
13 Malaysia, for example, the Ministry of Health (MOH) formed the Patient Safety  
14 Council of Malaysia in January 2003 to ensure that people receive safe health care.  
15 Malaysia Patient Safety Goals were then introduced on June 24, 2013, outlining 13  
16 essential areas in patient safety, with specific goals and targets. Since then, multiple  
17 programs and efforts have been organized at both national and state levels to improve  
18 the awareness of healthcare staff regarding patient safety.

19 In the interest of patient safety, numerous studies have examined the causes of  
20 medical errors. Over the years, health care organizations' approaches to errors have  
21 shifted from person-centered to system-centered. The system-centered approach  
22 focuses on working conditions, rather than individual mistakes.(4) Further, the WHO  
23 Patient Safety Methods and Measures Working Group identified the need to  
24 understand a range of human factors such as managerial, team, and individual  
25 characteristics that influence healthcare staff behavior concerning patient safety. A  
26 WHO report identified safety culture as one of the 10 key human factors relevant to  
27 patient safety.(5) Safety culture or attitude influences the typical behaviors of workers  
28 in a particular ward or unit. It affects patient safety as it determines the accepted  
29 practices within an organization. Thus, evaluating the safety attitude and  
30 understanding the components and influencers of safety culture is important to  
31 develop strategies for creating a culture committed to providing patients with the  
32 safest possible care.



1 Furthermore, reported patient-safety-related incidents have increased over the  
2 years. In England, the number of patient-safety-related incidents reported to the  
3 National Reporting and Learning System in 2018 increased by 3.5%.<sup>(6)</sup> In Malaysia,  
4 patient-safety-related incidents such as medication errors, transfusion errors, and  
5 patient falls have increased since 2014.<sup>(7)</sup> An outpatient geriatric pharmacy reported  
6 20 cases of medication errors daily, costing approximately RM111 924 per year. This  
7 increasing trend in medical errors raises concern, as it indicates that our healthcare  
8 facilities may not be safe for patients. It also has the potential to lead to medico-legal  
9 repercussions, which would tarnish the reputation of the MOH and create a financial  
10 burden on the patients and the ministry.

11 The present study was conducted at a cluster hospital in the state of Kedah,  
12 Malaysia. A cluster hospital is defined as a group of hospitals in the same  
13 geographical location within a state that collaborate and operate as one organization;  
14 it is an MOH Malaysia initiative aimed at transforming healthcare service delivery in  
15 the country. Additionally, it has been recognized as a Government Transformation  
16 Program, a high-impact initiative by the Public Service Department, and one of the  
17 top 10 priorities of the MOH Plan of Action (2016–2020). The objective of the cluster  
18 hospital is to optimize resource utilization. The hospitals collaborate and have an  
19 aligned flow of patients and services. A typical cluster hospital consists of a lead  
20 hospital (LH), usually a state hospital or major specialist hospital. Meanwhile, non-  
21 LHs (NLH) are usually the district non-specialist hospitals that provide specialist  
22 services based on the cluster hospital concept.

23 Thus, this study's main objective was to assess the baseline level and mean score  
24 of every domain of patient-safety culture among healthcare professionals at a cluster  
25 hospital. It identified the determinants associated with patient-safety culture and  
26 developed a model for the predictive factors of positive patient-safety culture.

## 27 **METHODS**

### 28 **Study design and sampling**

29 This cross-sectional study was conducted at a cluster hospital consisting of a state  
30 hospital and two district hospitals in Malaysia. As all three hospitals are public  
31 hospitals, they implement similar patient-safety practices and policies. Data were  
32 collected from December 2019 to February 2020. All doctors, pharmacists, nurses,

1 and assistant medical officers (AMO) who were involved directly with patient care  
2 processes and who had been working at the hospitals for at least four weeks were  
3 included in the study. Those who worked in management and who were on a long  
4 leave were excluded from the study.

5 The samples were selected through proportionate stratified random sampling to  
6 ensure that, throughout the population, the sample size selected from each subgroup  
7 was proportional to the size of that subgroup. The same sampling method was used to  
8 determine how many representatives from each professional category would be  
9 selected. The sample size required, which was calculated using StatCalc Epi Info 7.2,  
10 was 778, at 95% confidence interval (CI) and with 80% power. However, considering  
11 a dropout rate of 20%, the final sample size required was 934.

## 12 **Measures**

13 One of the ubiquitously used tools for measuring patient-safety culture in healthcare is  
14 the Safety Attitude Questionnaire (SAQ), which has been adapted for various clinical  
15 settings such as intensive care units, general inpatient settings, emergency services,  
16 operation theatres, and pharmacies. Here, we used both English and Malay versions of  
17 the SAQ. The Malay version has been validated in the Malaysian healthcare  
18 setting,(8) with good construct validity and internal consistency.(9)

19 The SAQ comprises 36 items for assessing six safety culture domains: teamwork  
20 climate (items 1–6), safety climate (items 7–13), job satisfaction (items 15–19), stress  
21 recognition (items 20–23), perceptions of management (items 24–28), and working  
22 conditions (items 29–32). Items 14 and 33–36 are not among the abovementioned  
23 scales. All items are closed-ended questions, and respondents are required to indicate  
24 their agreement level on a 5-point Likert scale ranging from 1 (disagree strongly) to 5  
25 (agree strongly). The respondents' demographic information such as age, gender,  
26 race, profession, education level, current working hospital and unit, length of service,  
27 and working hours per week were obtained as well. Information on patient safety  
28 training and the incident reporting system in the organization was also added to the  
29 questionnaire to assess the factors affecting patient-safety culture levels among  
30 healthcare professionals.

31 Data were analyzed using SPSS 21, and the respondents' demographic  
32 characteristics and patient-safety culture level were determined using univariate

1 analysis. Before the analysis, three negatively worded items (items 2, 11, and 36) in  
2 the SAQ were reversed. Each item's score was calculated by converting the 5-point  
3 Likert scale into a 100-point scale: 1 = 0, 2 = 25, 3 = 50, 4 = 75, and 5 = 100. Each  
4 item's score within the same dimension was summed and divided by the number of  
5 items available for that dimension to obtain a score of 0–100. If a respondent's mean  
6 score was  $\geq 75$ , they had a positive safety culture for a given dimension. The  
7 respondent's overall score for the patient-safety culture level was calculated using the  
8 same method.

9 The differences between two independent groups of normally distributed numerical  
10 data were analyzed using an independent t-test; the association between two sets of  
11 categorical data was examined using Pearson's chi-square test for independence.  
12 Multiple logistic regression was used to examine the association between risk factors  
13 and two outcome categories. All probability values were 2-sided, and a level of  
14 significance of  $< 0.05$  ( $p < 0.05$ ) was considered as statistically significant. Finally, the  
15 model fitness was tested using the Hosmer-Lemeshow test and classification table.

### 17 **Ethical issues/statement**

18 This study received ethics approval from the Universiti Kebangsaan Malaysia (UKM)  
19 Ethics Committee and the MOH Medical Research Etiquette Committee (MREC).  
20 Respondents were informed about the background and aim of the study and the  
21 confidentiality of the data submitted in the questionnaire, and their consent was  
22 obtained prior to answering the questionnaire.

### 24 **Patient and Public Involvement**

25 Patients or the public were not involved in the design, or conduct, or reporting, or  
26 dissemination plans of our research.

## 27 **RESULTS**

28 After 2000 questionnaires were distributed to the healthcare professionals who met  
29 the inclusion criteria, 1814 completed questionnaires were returned, resulting in an  
30 overall response rate of 90.7%.

## 1 Descriptive analysis

### 2 Demographic Characteristics

3 Table 1 shows the respondents' general demographic characteristics. Most  
 4 respondents were female and Malay, with a mean age of 34.29 years. The majority  
 5 were from the non-doctor group, diploma holders and had been working at their  
 6 current departments or units for approximately five years. Most respondents (95.6%)  
 7 agreed that patient safety training was available at their organization, and 81% had  
 8 attended such programs at least once. More than half the respondents felt that the  
 9 incident reporting system was punitive.

10 Table 1: Demographic characteristics of the respondents

| Demographic characteristics                                                           |                   | Overall               |             |
|---------------------------------------------------------------------------------------|-------------------|-----------------------|-------------|
|                                                                                       |                   | Frequency<br>(n=1800) | Percent (%) |
| Age; mean (SD), median                                                                |                   | 34.29 (7.223), 33.00  |             |
| Gender                                                                                | Male              | 373                   | 20.7        |
|                                                                                       | Female            | 1427                  | 79.3        |
| Race                                                                                  | Malay             | 1567                  | 87.1        |
|                                                                                       | Non-Malay         | 233                   | 12.9        |
| Profession                                                                            | Doctor            | 479                   | 26.6        |
|                                                                                       | Non-doctors       | 1321                  | 73.4        |
| Education level                                                                       | Diploma           | 1189                  | 66.1        |
|                                                                                       | Degree and above  | 611                   | 33.9        |
| Current working hospital                                                              | Lead Hospital     | 1532                  | 85.1        |
|                                                                                       | Non-Lead Hospital | 268                   | 14.9        |
| Location of work/ department                                                          | Medical based     | 549                   | 30.5        |
|                                                                                       | Surgical based    | 589                   | 32.7        |
|                                                                                       | Others            | 662                   | 36.8        |
| Length of service; mean (SD), median                                                  |                   | 63.65 (61.266), 48.00 |             |
| Working hours per week                                                                | ≤ 48 hours        | 1258                  | 69.9        |
|                                                                                       | > 48 hours        | 542                   | 30.1        |
| Availability of training on patient safety                                            | Yes               | 1720                  | 95.6        |
|                                                                                       | No                | 80                    | 4.4         |
| Participation in patient safety program or training                                   | Yes               | 1458                  | 81          |
|                                                                                       | No                | 342                   | 19          |
| The overall perception of the incident reporting system                               | Good              | 1619                  | 89.9        |
|                                                                                       | Poor              | 181                   | 10.1        |
| The incident reporting system is punitive                                             | Yes               | 1128                  | 62.7        |
|                                                                                       | No                | 672                   | 37.3        |
| Learned something from the incidence reported (Instructive incident reporting system) | Yes               | 1707                  | 94.8        |
|                                                                                       | No                | 93                    | 5.2         |
| Will report patient safety incidents to the higher authority                          |                   |                       |             |

|     |      |      |
|-----|------|------|
| Yes | 1750 | 97.2 |
| No  | 50   | 2.8  |

1

## 2 Patient Safety Culture Level

3 The patient-safety culture levels among the respondents are shown in Table 2.  
 4 Overall, less than a quarter of the respondents (23.9%) had a positive patient-safety  
 5 culture. Notably, more than half the respondents had a negative attitude for most of  
 6 the dimensions tested, except for job satisfaction. NLH respondents had a higher  
 7 percentage of positive responses for the overall patient safety culture, compared to LH  
 8 respondents.

9

10

Table 2: Patient safety culture levels among healthcare professionals

| Patient Safety Culture Level | Overall               |                | LH                    |                | NLH                  |                |
|------------------------------|-----------------------|----------------|-----------------------|----------------|----------------------|----------------|
|                              | Frequency<br>(n=1800) | Percent<br>(%) | Frequency<br>(n=1532) | Percent<br>(%) | Frequency<br>(n=268) | Percent<br>(%) |
| Teamwork Climate             |                       |                |                       |                |                      |                |
| Negative                     | 1133                  | 62.9           | 975                   | 63.6           | 158                  | 59.0           |
| Positive                     | 667                   | 37.1           | 557                   | 36.4           | 110                  | 41.0           |
| Safety Climate               |                       |                |                       |                |                      |                |
| Negative                     | 1149                  | 63.8           | 1000                  | 65.3           | 149                  | 55.6           |
| Positive                     | 651                   | 36.2           | 532                   | 34.7           | 119                  | 44.4           |
| Job Satisfaction             |                       |                |                       |                |                      |                |
| Negative                     | 594                   | 33.0           | 518                   | 33.8           | 76                   | 28.4           |
| Positive                     | 1206                  | 67.0           | 1014                  | 66.2           | 192                  | 71.6           |
| Stress Recognition           |                       |                |                       |                |                      |                |
| Negative                     | 1049                  | 58.3           | 864                   | 56.4           | 185                  | 69.0           |
| Positive                     | 751                   | 41.7           | 668                   | 43.6           | 83                   | 31.0           |
| Perceptions of Management    |                       |                |                       |                |                      |                |
| Negative                     | 1279                  | 71.1           | 1099                  | 71.7           | 180                  | 67.2           |
| Positive                     | 521                   | 28.9           | 433                   | 28.3           | 88                   | 32.8           |
| Working Conditions           |                       |                |                       |                |                      |                |
| Negative                     | 1389                  | 77.2           | 1165                  | 76.0           | 224                  | 83.6           |
| Positive                     | 411                   | 22.8           | 367                   | 24.0           | 44                   | 16.4           |
| Overall Safety Culture       |                       |                |                       |                |                      |                |
| Negative                     | 1370                  | 76.1           | 1179                  | 77.0           | 191                  | 71.3           |
| Positive                     | 430                   | 23.9           | 353                   | 23.0           | 77                   | 28.7           |

11

12 The mean scores for each patient-safety culture dimension are presented in **Error!**  
 13 **Reference source not found.** The cluster hospital's overall mean score was 67.82,  
 14 and the LH and NLH had comparable mean scores. The job satisfaction dimension

had the highest mean score (76.54), followed by safety climate (69.36), teamwork climate (69.18), perception of management (64.87), stress recognition (62.80), and working condition (62.27). The NLH had higher mean scores than the LH for most dimensions, except stress recognition and working condition.

Table 3: Mean scores of patient safety culture by dimension

| Patient Safety Culture Domains | Overall       |                                     | LH            |                                     | NLH           |                                     |
|--------------------------------|---------------|-------------------------------------|---------------|-------------------------------------|---------------|-------------------------------------|
|                                | Mean (SD)     | Positive response ( $\geq 75$ ) (%) | Mean (SD)     | Positive response ( $\geq 75$ ) (%) | Mean (SD)     | Positive response ( $\geq 75$ ) (%) |
| Teamwork climate               | 69.18 (12.83) | 37.1                                | 69.03 (12.84) | 36.4                                | 70.08 (12.75) | 41.0                                |
| Safety climate                 | 69.36 (12.55) | 36.2                                | 69.03 (12.42) | 34.7                                | 71.25 (13.17) | 44.4                                |
| Job satisfaction               | 76.54 (17.77) | 67.0                                | 76.27 (17.90) | 66.2                                | 78.10 (16.96) | 71.6                                |
| Stress recognition             | 62.80 (24.68) | 41.7                                | 63.70 (24.41) | 43.6                                | 57.65 (25.58) | 31.0                                |
| Perception of management       | 64.87 (16.24) | 28.9                                | 64.68 (16.26) | 28.3                                | 65.93 (16.13) | 32.8                                |
| Working condition              | 62.27 (12.64) | 22.8                                | 62.57 (12.73) | 24.0                                | 60.56 (11.97) | 16.4                                |
| Overall safety culture         | 67.82 (10.53) | 23.9                                | 67.80 (10.53) | 23.0                                | 67.90 (10.54) | 28.7                                |

### Bivariate Analysis

Table 4 shows the result of the analysis to determine the associated factors for the patient safety culture among healthcare professionals in a cluster hospital. Overall, a significant association was noted between patient safety culture level and race ( $p = 0.004$ ), profession ( $p < 0.05$ ), education level ( $p < 0.001$ ), current working hospital ( $p = 0.044$ ), current department or unit ( $p < 0.001$ ), and working hours per week ( $p = 0.0001$ ). There was also a significant association between patient safety culture level and patient safety-related questions.

1  
2

Table 4: Factors associated with patient safety culture

| Variable                                                                              | Patient safety culture |                   |         |
|---------------------------------------------------------------------------------------|------------------------|-------------------|---------|
|                                                                                       | Negative<br>n (%)      | Positive<br>n (%) | p-value |
| Age: Median (IQR)                                                                     | 32.00 (10.0)           | 35.00 (11.0)      | < 0.05  |
| Gender                                                                                |                        |                   |         |
| Male                                                                                  | 281 (75.3)             | 92 (24.7)         | 0.693   |
| Female                                                                                | 1089 (76.3)            | 338 (23.7)        |         |
| Race                                                                                  |                        |                   |         |
| Malay                                                                                 | 1175 (75.0)            | 392 (25.0)        | 0.004   |
| Non-Malay                                                                             | 195 (83.7)             | 38 (16.3)         |         |
| Profession                                                                            |                        |                   |         |
| Doctor                                                                                | 405 (84.6)             | 74 (15.4)         | < 0.05  |
| Non-doctors                                                                           | 965 (73.1)             | 356 (26.9)        |         |
| Education level                                                                       |                        |                   |         |
| Diploma                                                                               | 843 (70.9)             | 346 (29.1)        | < 0.001 |
| Degree and above                                                                      | 527 (86.3)             | 84 (13.7)         |         |
| Current working hospital                                                              |                        |                   |         |
| LH                                                                                    | 1179 (77.0)            | 353 (23.0)        | 0.044   |
| NLH                                                                                   | 191 (71.3)             | 77 (28.7)         |         |
| Location of work/ department                                                          |                        |                   |         |
| Medical                                                                               | 406 (74.0)             | 143 (26.0)        | < 0.001 |
| Surgical                                                                              | 411 (69.8)             | 178 (30.2)        |         |
| Others                                                                                | 553 (83.5)             | 109 (16.5)        |         |
| Length of service; Median (IQR)                                                       | 48.00 (85.0)           | 50.50 (91.0)      | 0.069   |
| Working hours per week                                                                |                        |                   |         |
| ≤ 48 hours                                                                            | 926 (73.6)             | 332 (26.4)        | 0.0001  |
| > 48 hours                                                                            | 444 (81.9)             | 98 (18.1)         |         |
| Availability of training on patient safety                                            |                        |                   |         |
| Yes                                                                                   | 1296 (75.3)            | 424 (24.7)        | 0.0004  |
| No                                                                                    | 74 (92.5)              | 6 (7.5)           |         |
| Participation in patient safety program or training                                   |                        |                   |         |
| Yes                                                                                   | 1074 (73.7)            | 384 (26.3)        | < 0.05  |
| No                                                                                    | 296 (86.5)             | 46 (13.5)         |         |
| The overall perception of the incident reporting system                               |                        |                   |         |
| Good                                                                                  | 1209 (74.7)            | 410 (25.3)        | < 0.05  |
| Poor                                                                                  | 161 (89.0)             | 20 (11.0)         |         |
| The incident reporting system is punitive                                             |                        |                   |         |
| Yes                                                                                   | 862 (76.4)             | 266 (23.6)        | 0.692   |
| No                                                                                    | 508 (75.6)             | 164 (24.4)        |         |
| Learned something from the incidence reported (Instructive incident reporting system) |                        |                   |         |
| Yes                                                                                   | 1283 (75.2)            | 424 (24.8)        | 0.0001  |
| No                                                                                    | 87 (93.5)              | 6 (6.5)           |         |
| Will report patient safety incidents to the higher authority                          |                        |                   |         |
| Yes                                                                                   | 1325 (75.7)            | 425 (24.3)        | 0.019   |
| No                                                                                    | 45 (90.0)              | 5 (10.0)          |         |

## 1 Multivariate analysis

2 Multiple logistic regression was conducted to identify a model of the predictive  
 3 factors that are associated with a positive patient-safety culture (Table 5). The factors  
 4 included in the model and that were significantly associated with positive patient-  
 5 safety culture were age, gender, education level, working department/unit,  
 6 participation in patient safety training, good perception of incident reporting and  
 7 learning systems, and non-blaming and instructive incident reporting systems in the  
 8 organization. The model fitness was tested using the Hosmer-Lemeshow test ( $p =$   
 9 0.788) and the classification table (76.5%). Nagelkerke's  $R^2$  showed that this logistic  
 10 model explained 11.4% of the variation in the outcome variable.

11 Table 5: Multiple logistic regression  
 12  
 13

| Variable                                                                                 | Overall safety culture |         |              |                 |
|------------------------------------------------------------------------------------------|------------------------|---------|--------------|-----------------|
|                                                                                          | Wald                   | Adj. OR | (95% CI)     | <i>p</i> -value |
| Age; median (IQR)                                                                        | 13.046                 | 1.03    | (1.02, 1.05) | < 0.001         |
| Gender                                                                                   |                        |         |              | 0.001           |
| Male                                                                                     | 11.896                 | 1.67    | (1.25, 2.24) |                 |
| Female                                                                                   |                        | 1.00    |              |                 |
| Education level                                                                          |                        |         |              | < 0.001         |
| Diploma                                                                                  | 35.547                 | 2.51    | (1.85, 3.34) |                 |
| Degree and above                                                                         |                        | 1.00    |              |                 |
| Location of work/ department                                                             |                        |         |              | < 0.001         |
| Medical based                                                                            | 7.136                  | 1.49    | (1.11, 2.00) |                 |
| Surgical based                                                                           | 23.059                 | 2.02    | (1.51, 2.68) |                 |
| Others                                                                                   |                        | 1.00    |              |                 |
| Participation in patient safety program or training                                      |                        |         |              | 0.007           |
| Yes                                                                                      | 7.321                  | 1.64    | (1.15, 2.34) |                 |
| No                                                                                       |                        | 1.00    |              |                 |
| The overall perception of the incident reporting system                                  |                        |         |              | 0.038           |
| Good                                                                                     | 4.303                  | 1.71    | (1.03, 2.83) |                 |
| Poor                                                                                     |                        | 1.00    |              |                 |
| The incident reporting system is punitive                                                |                        |         |              | 0.013           |
| Yes                                                                                      |                        | 1.00    |              |                 |
| No                                                                                       | 6.107                  | 1.36    | (1.07, 1.73) |                 |
| Learned something from the incidence reported<br>(Instructive incident reporting system) |                        |         |              | 0.007           |



|     |       |      |              |
|-----|-------|------|--------------|
| Yes | 7.405 | 3.31 | (1.40, 7.85) |
| No  |       | 1.00 |              |

## DISCUSSION

The response rate of the present study is 90.7%; thus, it is considered good and positive compared with that of previous local studies that used the same instrument, which was 58.0–83%.<sup>(8, 10-12)</sup> Further, other local studies have used tools other than the SAQ, and recorded lower response rates (i.e. 78–81%), compared to that of the present study.<sup>(13, 14)</sup> Furthermore, the response rate in our study was higher compared to international benchmarking data in the US, UK, and New Zealand, which was 65.7–72.2%,<sup>(15)</sup> and other studies conducted across the world.<sup>(16-19)</sup> The greater response rate in our study may be potentially because this is the first study on patient safety conducted in our cluster hospital community; therefore, most departments were interested in participating. The high response rate could also be an obvious indication of employee commitment and dedication to quality issues, all of which signify responsible conduct. Further, the administered questionnaire has positive features, which makes it more user-friendly, compared to other tools. Among those features are self-administered questionnaires with clear terms and limited number of items that only require a short time for respondents to complete.

At our cluster hospital, the respondents lacked a patient safety culture, far below the international benchmarking standard, which is appropriately 60%,<sup>(15)</sup> and that of other previous international studies.<sup>(16, 20-23)</sup> However, compared to previous local studies, we recorded a higher percentage of positive responses than Sarifulnizam et al. (2019) and comparable responses to Samsuri et al. (2015). We noted that the NLH had a greater proportion of respondents with a positive patient-safety culture. This finding correlates with Samsuri et al. (2015), who found that respondents in smaller institutions had a more positive safety culture than those working in hospitals. Other studies have also stated that smaller institutions tend to have a better safety culture compared to large institutions.<sup>(24)</sup> The reason could be that small institutions, such as NLH, have more similar environments and smaller work communities, whereby workers are more likely to hold and share the same climate. Only the job satisfaction dimension had a high percentage of positive responses (>60%), similar to other previous local studies.<sup>(10, 12)</sup> The other five dimensions showed low positive responses, between 22% and 41%.

1  
2  
3  
4  
5  
6  
7  
8  
9  
10  
11  
12  
13  
14  
15  
16  
17  
18  
19  
20  
21  
22  
23  
24  
25  
26  
27  
28  
29  
30  
31  
32  
33  
34  
35  
36  
37  
38  
39  
40  
41  
42  
43  
44  
45  
46  
47  
48  
49  
50  
51  
52  
53  
54  
55  
56  
57  
58  
59  
60

1 In the present study, the overall mean score was slightly higher than that of a study  
2 conducted among pharmacists in Melaka (67.82 versus 65.6). Five out of six  
3 dimensions had higher mean scores compared to those recorded by Samsuri et al.  
4 (2015); in increasing score order, they were working condition (62.27 versus 54.8),  
5 perception of management (64.87 versus 62.20), teamwork climate (69.18 versus  
6 67.6), safety climate (69.36 versus 66.8), and job satisfaction (76.54 versus 67.3).  
7 Compared with international benchmarking data, safety climate, job satisfaction,  
8 perception of management, and working condition dimensions had higher mean  
9 scores, while the teamwork climate mean score was comparable to the benchmarking  
10 data.(15)

11 In the study, the stress recognition dimension had a lower mean score compared to  
12 international benchmarking data by Sexton et al. (2006) (62.80 versus 65.90), other  
13 international studies,(15, 21, 22) and the local research by Samsuri et al. (2015). The  
14 stress recognition dimension is defined as an acknowledgement of how stressors  
15 influence performance; a lower score means that the surveyed staff members have  
16 relatively low recognition of the performance consequences of stress and fatigue. This  
17 sense of invulnerability can also be observed in several other professions such as in  
18 the aviation industry, and appears to be more prevalent in healthcare settings.(25, 26)  
19 Our results showing that medical workers do not fully understand the impact of stress  
20 and exhaustion mirror the findings of others,(17, 27) as they are too accustomed to  
21 busy work schedules and heavy workloads. Therefore, staff members should admit  
22 that stress, high workload, and sleep deprivation are among the causes of reduced job  
23 performance and increased risk of medical errors.

24 Although higher than the international benchmarking scores, the mean score of the  
25 working condition dimension reported in our study was the lowest among the six  
26 dimensions examined. This finding is similar to that of some studies.(8, 12, 21, 25)  
27 The mean score and positive response rate were lowest in the NLH, compared to the  
28 LH. This finding reflects employees' frustration with work environment quality and  
29 logistic support such as staffing and equipment. Further analysis of the items under  
30 this dimension revealed that most respondents from both the LH and NLH disagreed  
31 with the statement "the level of staffing in this clinical area is sufficient to handle the  
32 number of patients." This finding is expected from respondents in the LH, which is a  
33 state tertiary hospital with a high workload. However, the NLH respondents also

1 indicated insufficient levels of staffing at their hospitals. This observation may be  
2 because although the NLH is a non-specialist district hospital, the workload has risen  
3 following the extension of specialist services to the NLH after the cluster hospital  
4 model was introduced; however, the number of staff remained the same. Lack of staff,  
5 increased patient volume, expansion of clinical services, and higher expectations from  
6 other healthcare professionals may have contributed to the increased workload, which  
7 could jeopardize patient safety.

8 The job satisfaction dimension had the highest positive response rate among all  
9 dimensions in the SAQ, despite most staff being dissatisfied with their working  
10 conditions. Our finding is congruent with that of local studies conducted at a teaching  
11 hospital and at public hospitals.(10, 12) Here, 67.0% of the respondents had a positive  
12 response (score > 75%) for this dimension, which is higher than that reported in local  
13 studies (8, 10) as well as international benchmarking data,(15) wherein the positive  
14 response rate was 46.2–62.7%. Our finding is also consistent with other previous  
15 studies.(17, 22) Job satisfaction positivity indicates that most of the cluster hospital  
16 staff, especially the NLH staff, are relatively pleased with their jobs and that they  
17 have positive work experiences. This finding is based on the high percentage of  
18 participants who answered positively for the item “I like my job” (82.6%), the highest  
19 scored item in the SAQ. The value of job satisfaction cannot be overlooked because it  
20 is imperative that it increases workers’ enthusiasm and enhances work efficiency and  
21 quality, indirectly improving patient safety. Those with higher job satisfaction would  
22 more likely be actively involved in accepting and implementing future quality-  
23 enhancement strategies.

24 Our study also reveals that teamwork climate and safety climate had the second  
25 highest mean scores after the job satisfaction dimension, with 37.1% and 36.2%  
26 positive responses, respectively, which is similar to other studies.(8, 15, 27, 28) Two  
27 items scored lowest under these dimensions: The respondents perceived difficulty in  
28 reporting problems with patient care, and it was also difficult to discuss errors in their  
29 clinical area, indicating that the existing culture in that area was unreliable and  
30 discouraging toward a patient safety culture and incident reporting. Experts state that  
31 the influence of teamwork should not be underestimated.(29) Many studies have  
32 shown that teamwork can dramatically enhance patient outcomes and reduce  
33 preventable errors.(30, 31) In the current dynamic medical climate, healthcare

1 professionals have recognized the value of knowledge and complementary skills.  
2 However, mutual confidence and two-way communication capabilities between team  
3 members should be strengthened. A survey also concluded that the principal  
4 characteristics of a safety culture are teamwork within the unit and honest and open  
5 communication among healthcare professionals and with patients.(32) Thus,  
6 improvements should be made to encourage staff to communicate, particularly when  
7 patient care and safety are concerned.

8 The predictive factors identified as significantly associated with positive patient-  
9 safety culture are similar for most studies. Those working in surgery- and medical-  
10 based departments were more likely to have a positive patient-safety culture, relative  
11 to other categories. The findings may be linked to their working environment, which  
12 may cause them to perceive safety issues differently. Other departments may not  
13 consider some of these issues as relevant.(20) Those in surgery-based departments  
14 deal with surgical procedures; thus, they are more susceptible to patient safety  
15 concerns, as they could face medicolegal implications for an error or incident such as  
16 incorrect surgery and retained foreign bodies such as gauze.

17 Patient safety-related training and education were identified as other important  
18 factors in achieving improved patient safety.(33) This finding is congruent with a  
19 study conducted in Kuwait, which found that the perception of patient safety culture  
20 decreased among those who did not attend patient safety courses or lectures.(20, 34)  
21 Further, healthcare professionals who did not receive any information about patient  
22 safety, either during their initial professional education or throughout their  
23 professions, had more negative attitudes to most of the dimensions of patient safety,  
24 compared to those who had received the information. A study that examined the effect  
25 of training on nurses' attitudes towards patient safety found that training had a  
26 significant positive impact on nurses' safety attitudes, particularly on the perception  
27 of management, job satisfaction, and safety climate dimensions.(35) Our finding is  
28 also in line with that of other studies.(36, 37)

29 Consequently, we may conclude that patient safety education is vital in healthcare  
30 professionals' patient safety attitudes. Organizational learning and continuous  
31 development such as staff training are reported as strengths due to the capacity of  
32 healthcare organizations to create a knowledge-enhancing environment for learning.  
33 Realizing the importance of training, the MOH Patient Safety Unit has incorporated a

1 patient safety-training module for house officers during their orientation programs  
2 before they begin their graduate training. The course, which is inspired by the WHO  
3 Multi-professional Curriculum Guide, is intended to provide house officers with  
4 relevant exposure and information to enhance patient safety. For the other healthcare  
5 professional categories, our cluster hospital has developed an initiative to conduct  
6 multiple courses regularly to ensure continuous awareness and updated patient safety  
7 knowledge.

8 Incident reporting, root causes, and risk analyses were also identified as the most  
9 critical factors for achieving positive patient safety culture. Our study shows a  
10 significant association between the incident reporting system and positive patient  
11 safety culture. The association between a non-punitive reporting system and patient  
12 safety culture is in line with most studies on patient safety factors.(33, 36-40) Most  
13 studies also mention a lower response toward non-punitive responses to error.(34, 39,  
14 41) Such findings indicate that a blame-and-shame culture in the workplace hinders  
15 accountability and causes workers to feel insecure and become prone to hiding their  
16 shortcomings, rather than sharing their concerns related to patient safety. Working in  
17 such an atmosphere would hinder learning from mistakes; individuals would only be  
18 criticized and punished, while system errors are overlooked.

19 Another study conducted in Beijing found that effective safety culture had not been  
20 achieved, as the incidents reported did not receive useful feedback, and openly  
21 discussing errors and incidents in the department was not encouraged.(17) This  
22 situation is similar to that of our study, in which 36.0% of respondents agreed that  
23 discussing errors in their clinical areas was challenging. However, most of our  
24 respondents agreed that they learned from the incidents reported. This was achieved  
25 by ensuring that staff members were informed about the incidents or errors and  
26 advised on the changes implemented. The practices and guidelines for preventing  
27 errors were also reviewed appropriately. Health care organizations should use incident  
28 reporting to strengthen patient safety culture and improve service quality. This can  
29 transform an organization's existing blame culture, from one where an error is viewed  
30 as a personal failure to one where errors are considered potential areas for  
31 improvement.

32 It is noteworthy that the multivariate analysis model developed in the present study  
33 only explained 11.4% of the variance in the positive patient safety culture

1 (Nagelkerke  $R^2 = 0.114$ ,  $p < 0.001$ ). Our finding is similar to that of Alqattan et al.  
2 (2018), but the variance is lower than that of other studies.(37, 42) Perhaps the  $R^2$   
3 could have been increased if we had included more predicted variables in this study.  
4 Several factors in previous studies with high  $R^2$  are worth considering for inclusion in  
5 our study. The most common factor is the number of events reported by the  
6 respondents.(8, 39, 41, 42) The details regarding the implementation of an incident  
7 reporting system are also crucial.(24, 37, 42, 43) It is also beneficial to obtain input on  
8 whether staff are exposed to information on patient safety during their initial  
9 education.(20)

## 10 **LIMITATIONS**

11 Few limitations were noted in this study. First, our study's data were only collected  
12 from a cluster hospital; our state has two other cluster hospitals located in the central  
13 and southern regions of Kedah. However, we consider that our study's findings  
14 provide a reasonably representative view of the patient safety culture that can be  
15 expected in the other two cluster hospitals in Kedah, as their settings were identical to  
16 those in our cluster. Another drawback is that we did not explore the connection  
17 between patient safety culture and the number of events reported by respondents and  
18 the patient outcome. Further research is required to identify the complicated  
19 relationship between patient safety-culture and incident reporting system, the number  
20 of reporting, patient outcome, and how the data produced can be translated into action  
21 and learning points. The findings are crucial and can guide us in interventions and  
22 improvements to create a safe healthcare system and reduce adverse medical  
23 outcomes.

24 The use of a questionnaire to evaluate safety culture or a particular safety  
25 environment plays an essential role in planning the evaluation of an institution's safety  
26 culture. Although a useful tool, SAQ has its limitation; it assesses staff's beliefs  
27 regarding the safety culture, rather than their real safety behavior.(28) Notably, SAQ  
28 tests the current attitude regarding patient safety; however, there may be differences  
29 between attitudes and actual practice. Therefore, to explore the dimensions that  
30 influence patient safety in more detail, SAQ should be combined with qualitative  
31 methods such as peer observation, group discussions, analysis of organization's  
32 incident history, and audits of the safety management system.(25, 34, 44) A wide gap



1 in research remains regarding how data obtained from different methods are related  
2 and how to combine them to get a complete safety culture view. Despite these  
3 limitations, we believe this research offers useful insight into our organizations'  
4 baseline patient safety culture.

## 5 **CONCLUSIONS**

6 Overall, only a minority of the healthcare professionals at our cluster hospital have a  
7 positive patient-safety culture (SAQ score  $\geq$  75%), which is far below the  
8 international benchmarking standard. Attention should be paid to most of the safety  
9 culture dimensions: working condition, perception of management, safety climate,  
10 teamwork climate, and stress recognition. Although the mean scores of the  
11 dimensions were mostly higher than the international standards, no dimension reached  
12 the 75% minimum score to be recognized as an area of strength. The significant  
13 findings include employees' frustration with work environment quality and logistics,  
14 particularly staffing levels in the clinical area. There is also much room for  
15 improvement in communication regarding patient safety issues and errors, indicating  
16 that the organization's existing culture is not reliable and encouraging toward patient  
17 safety culture and incident reporting. Staff were also overly accustomed to busy work  
18 schedules and heavy workloads; thus, they did not recognize the impact of stress on  
19 their work performance and patient safety. Staff members should admit that stress,  
20 high workload, and sleep deprivation are among the causes of reduced job  
21 performance and increased risk of medical errors. Despite that, most respondents  
22 expressed satisfaction with their job; this presents an opportunity, as those with higher  
23 job satisfaction are more likely to be actively involved in accepting and implementing  
24 future quality-enhancement strategies.

25 Meanwhile, management commitment towards patient safety-improvement  
26 activities is vital in nurturing healthcare professionals' positive culture. Patient safety  
27 training and the incident reporting system are two critical factors that should be  
28 emphasized to improve patient safety culture. Organizations should consider and  
29 implement a non-punitive and instructive incident reporting system as an instrument  
30 that can strengthen the patient safety culture.

31

1 **Contributorship statement:** Aniza Ismail and Siti Norhani Mazrah Khalid led the  
2 conceptualization and design of the study, Siti Norhani Mazrah Khalid conducted data  
3 collection, analysed the data and drafted the manuscript. Aniza Ismail provided  
4 intellectual input, supervised and revised the manuscript.

5 **Competing interest:** None declared.

6 **Funding:** No funding was received for the conduct of this study.

7 **Ethics approval:** This study has received approval from the Research Ethics  
8 Committee, Universiti Kebangsaan Malaysia, Medical Research Etiquette Committee  
9 (MREC), Ministry of Health (NMRR-19-2366-50240), and the Head of Cluster of  
10 Hospital Kluster Kedah Utara.

11 **Data sharing statement:** No additional data are available.

## 14 REFERENCES

- 16 1. Organization WH. Patient Safety 2019 [Available from:  
17 <https://www.who.int/news-room/facts-in-pictures/detail/patient-safety>.
- 18 2. Ulrich B, Kear T. Patient safety and patient safety culture: foundations of  
19 excellent health care delivery. *Nephrol Nurs J*. 2014;41(5).
- 20 3. Kohn LT, Corrigan J, Donaldson MS. To err is human: building a safer health  
21 system: National Academy Press Washington, DC; 2000.
- 22 4. Van B, Boer F, Akerboom S, Hudson P. Patient safety: latent risk factors. *Br J*  
23 *Anaesth*. 2010;105(1):52-9.
- 24 5. Organization WH. Human Factors in Patient Safety, Review of Topics and  
25 Tools World Health. 2009;2.
- 26 6. NHS Improvement. NRLS national patient safety incident reports:  
27 commentary. Available at [http://: www.improvement.nhs.uk](http://www.improvement.nhs.uk) Accessed. 2018;7.
- 28 7. Bakar NAA, Bakar AMA, Nahar N. M.P.S.G Malaysian Patient Safety Goals  
29 annual report 2017. Kementerian Kesihatan Malaysia; 2017.
- 30 8. Samsuri SE, Lin LP, Fahrni ML. Safety culture perceptions of pharmacists in  
31 Malaysian hospitals and health clinics: a multicentre assessment using the Safety  
32 Attitudes Questionnaire. *BMJ open*. 2015;5(11):e008889.
- 33 9. Kar C, Hamid H, editors. Adaptation of Safety Attitude Questionnaire (SAQ)  
34 in Malaysia healthcare setting. 10th Biennial Conference of Asian Association of  
35 Social Psychology; 2013.
- 36 10. Ismail A, Hamid SBSA, Sulong S. Assessment on perception of safety attitude  
37 among medical personnel at public hospitals in Malaysia. *Journal of Health Science*  
38 *and Medical Research*. 2020;38.
- 39 11. Krishnasamy K, Tan M, Zakaria M. Patient safety culture at a teaching  
40 hospital in Kuala Lumpur. *Age and Ageing*. 2019;48(Supplement\_4).



12. Sarifulnizam FA, Wen LK, Rozaimie ANA, Sheng TR, Mustapha NK, Ismail A. Safety attitude assessment among healthcare personnel in a teaching hospital. *Journal of Medical and Health*. 2019;14.
13. Alex RK, Chin Z, Sharlyn P, Priscilla B, Josephine S. Hospital survey on patient safety culture in Sarawak General Hospital: A cross sectional study. *The Medical journal of Malaysia*. 2019;74(5):385-8.
14. Ismail L, Yunus J. Assessment of patient safety culture in Malaysia hospital using Hospital Survey on Patient Safety Culture (HSOPSC) survey. *Journal of Advanced Research in Social and Behavioural Sciences*. 2015;1(1):19-31.
15. Sexton JB, Helmreich RL, Neilands TB, Rowan K, Vella K, Boyden J, et al. The Safety Attitudes Questionnaire: psychometric properties, benchmarking data, and emerging research. *BMC Health Services Research*. 2006;6(1):44.
16. Lee W-C, Wung H-Y, Liao H-H, Lo C-M, Chang F-L, Wang P-C, et al. Hospital safety culture in Taiwan: a nationwide survey using Chinese version Safety Attitude Questionnaire. *BMC Health Services Research*. 2010;10(1):234.
17. Cui Y, Xi X, Zhang J, Feng J, Deng X, Li A, et al. The safety attitudes questionnaire in Chinese: psychometric properties and benchmarking data of the safety culture in Beijing hospitals. *BMC Health Services Research*. 2017;17(1):590.
18. Zakari NM. Attitude of academic ambulatory nurses toward patient safety culture in Saudi Arabia. *Life Science Journal*. 2011;8(3):230-7.
19. Patel S, Wu AW. Safety culture in Indian hospitals: A cultural adaptation of the safety attitudes questionnaire. *Journal of Patient Safety*. 2016;12(2):75-81.
20. Brasaite I, Kaunonen M, Martinkenas A, Suominen T. Health care professionals' attitudes regarding patient safety: cross-sectional survey. *BMC Research Notes*. 2016;9(1):177.
21. Cheng H-C, Yen AM-F, Lee Y-H. Factors affecting patient safety culture among dental healthcare workers: a nationwide cross-sectional survey. *Journal of Dental Sciences*. 2019.
22. Elsous A, Akbari Sari A, Rashidian A, Aljeesh Y, Radwan M, AbuZaydeh H. A cross-sectional study to assess the patient safety culture in the Palestinian hospitals: a baseline assessment for quality improvement. *Journal of the Royal Society of Medicine open*. 2016;7(12):2054270416675235.
23. Zimmermann N, Küng K, Sereika SM, Engberg S, Sexton B, Schwendimann R. Assessing the safety attitudes questionnaire (SAQ), German language version in Swiss university hospitals-a validation study. *BMC Health Services Research*. 2013;13(1):347.
24. El-Jardali F, Dimassi H, Jamal D, Jaafar M, Hemadeh N. Predictors and outcomes of patient safety culture in hospitals. *BMC Health Services Research*. 2011;11(1):45.
25. Poley MJ, van der Starre C, van den Bos A, van Dijk M, Tibboel D. Patient safety culture in a Dutch pediatric surgical intensive care unit: an evaluation using the Safety Attitudes Questionnaire. *Pediatric Critical Care Medicine*. 2011;12(6):e310-e6.
26. Sexton JB, Thomas EJ, Helmreich RL. Error, stress, and teamwork in medicine and aviation: cross sectional surveys. *BMJ*. 2000;320(7237):745-9.
27. Zulkipli NW, Taib IA, Samsuddin N, Isa MLM. Patient safety culture attitudes among different healthcare professionals in selected general and district hospitals: a preliminary study. *Human Factors and Ergonomics Journal*. 2018;3(2):30-4.
28. Alqahtani AS, Evley R. Application of Safety Attitudes Questionnaire (SAQ) in adult intensive care units: a cross-sectional study. medRxiv. 2020.

- 1 29. Nieva V, Sorra J. Safety culture assessment: a tool for improving patient  
2 safety in healthcare organizations. *BMJ Quality & Safety*. 2003;12(suppl 2):ii17-ii23.
- 3 30. Walton M, Woodward H, Van Staalduin S, Lemer C, Greaves F, Noble D,  
4 et al. The WHO patient safety curriculum guide for medical schools. *BMJ Quality &*  
5 *Safety*. 2010;19(6):542-6.
- 6 31. Lo L. Teamwork and communication in healthcare: A literature review.  
7 Canadian Patient Safety Institute. 2011.
- 8 32. Abdou HA, Saber KM. A baseline assessment of patient safety culture among  
9 nurses at student university hospital. *World Journal of Medical Sciences*.  
10 2011;6(1):17-26.
- 11 33. Nygren M, Roback K, Öhrn A, Rutberg H, Rahmqvist M, Nilsen P. Factors  
12 influencing patient safety in Sweden: perceptions of patient safety officers in the  
13 county councils. *BMC Health Services Research*. 2013;13(1):52.
- 14 34. Alqattan H, Cleland J, Morrison Z. An evaluation of patient safety culture in a  
15 secondary care setting in Kuwait. *Journal of Taibah University Medical Sciences*.  
16 2018;13(3):272-80.
- 17 35. Azimi L, Tabibi SJ, Maleki MR, Nasiripour AA, Mahmoodi M. Influence of  
18 training on patient safety culture: a nurse attitude improvement perspective.  
19 *International Journal of Hospital Research*. 2012;1:51-6.
- 20 36. Ridelberg M, Roback K, Nilsen P. Facilitators and barriers influencing patient  
21 safety in Swedish hospitals: a qualitative study of nurses' perceptions. *BMC Nursing*.  
22 2014;13(1):23.
- 23 37. Wami SD, Demssie AF, Wassie MM, Ahmed AN. Patient safety culture and  
24 associated factors: A quantitative and qualitative study of healthcare workers' view in  
25 Jimma zone Hospitals, Southwest Ethiopia. *BMC Health Services Research*.  
26 2016;16(1):495.
- 27 38. Gaal S, Verstappen W, Wensing M. What do primary care physicians and  
28 researchers consider the most important patient safety improvement strategies? *BMC*  
29 *Health Services Research*. 2011;11(1):102.
- 30 39. Mahrous MS. Patient safety culture as a quality indicator for a safe health  
31 system: experience from Almadinah Almunawwarah, KSA. *Journal of Taibah*  
32 *University Medical Sciences*. 2018;13(4):377-83.
- 33 40. Tear MJ, Reader TW, Shorrocks S, Kirwan B. Safety culture and power:  
34 Interactions between perceptions of safety culture, organisational hierarchy, and  
35 national culture. *Safety Science*. 2020;121:550-61.
- 36 41. Alswat K, Abdalla RAM, Titi MA, Bakash M, Mehmood F, Zubairi B, et al.  
37 Improving patient safety culture in Saudi Arabia (2012–2015): trending, improvement  
38 and benchmarking. *BMC Health Services Research*. 2017;17(1):516.
- 39 42. Kumbi M, Hussen A, Abate Lette SN, Morka G. Patient safety culture and  
40 associated factors among health care providers in bale zone hospitals, Southeast  
41 Ethiopia: An institutional based cross-sectional study. *Drug, Healthcare and Patient*  
42 *Safety*. 2020;12:1.
- 43 43. Albalawi A, Kidd L, Cowey E. Factors contributing to the patient safety  
44 culture in Saudi Arabia: a systematic review. *BMJ open*. 2020;10(10):e037875.
- 45 44. Hays DG, Singh AA. *Qualitative inquiry in clinical and educational settings:*  
46 Guilford Press; 2011.

STROBE Statement—Checklist of items that should be included in reports of *cross-sectional studies*

|                              | Item No | Recommendation                                                                                                                                                                                               | Page No |
|------------------------------|---------|--------------------------------------------------------------------------------------------------------------------------------------------------------------------------------------------------------------|---------|
| <b>Title and abstract</b>    | 1       | (a) Indicate the study's design with a commonly used term in the title or the abstract                                                                                                                       | 1       |
|                              |         | (b) Provide in the abstract an informative and balanced summary of what was done and what was found                                                                                                          | 1-2     |
| <b>Introduction</b>          |         |                                                                                                                                                                                                              |         |
| Background/rationale         | 2       | Explain the scientific background and rationale for the investigation being reported                                                                                                                         | 4-5     |
| Objectives                   | 3       | State specific objectives, including any prespecified hypotheses                                                                                                                                             | 5       |
| <b>Methods</b>               |         |                                                                                                                                                                                                              |         |
| Study design                 | 4       | Present key elements of study design early in the paper                                                                                                                                                      | 6       |
| Setting                      | 5       | Describe the setting, locations, and relevant dates, including periods of recruitment, exposure, follow-up, and data collection                                                                              | 6       |
| Participants                 | 6       | (a) Give the eligibility criteria, and the sources and methods of selection of participants                                                                                                                  | 6       |
| Variables                    | 7       | Clearly define all outcomes, exposures, predictors, potential confounders, and effect modifiers. Give diagnostic criteria, if applicable                                                                     | 6       |
| Data sources/<br>measurement | 8*      | For each variable of interest, give sources of data and details of methods of assessment (measurement). Describe comparability of assessment methods if there is more than one group                         | 6       |
| Bias                         | 9       | Describe any efforts to address potential sources of bias                                                                                                                                                    | 6       |
| Study size                   | 10      | Explain how the study size was arrived at                                                                                                                                                                    | 7       |
| Quantitative variables       | 11      | Explain how quantitative variables were handled in the analyses. If applicable, describe which groupings were chosen and why                                                                                 | 7       |
| Statistical methods          | 12      | (a) Describe all statistical methods, including those used to control for confounding                                                                                                                        | 8       |
|                              |         | (b) Describe any methods used to examine subgroups and interactions                                                                                                                                          | 8       |
|                              |         | (c) Explain how missing data were addressed                                                                                                                                                                  | 8       |
|                              |         | (d) If applicable, describe analytical methods taking account of sampling strategy                                                                                                                           | 8       |
|                              |         | (e) Describe any sensitivity analyses                                                                                                                                                                        | 8       |
| <b>Results</b>               |         |                                                                                                                                                                                                              |         |
| Participants                 | 13*     | (a) Report numbers of individuals at each stage of study—eg numbers potentially eligible, examined for eligibility, confirmed eligible, included in the study, completing follow-up, and analysed            | 8       |
|                              |         | (b) Give reasons for non-participation at each stage                                                                                                                                                         | -       |
|                              |         | (c) Consider use of a flow diagram                                                                                                                                                                           | -       |
| Descriptive data             | 14*     | (a) Give characteristics of study participants (eg demographic, clinical, social) and information on exposures and potential confounders                                                                     | 8-9     |
|                              |         | (b) Indicate number of participants with missing data for each variable of interest                                                                                                                          | 8-9     |
| Outcome data                 | 15*     | Report numbers of outcome events or summary measures                                                                                                                                                         | 9       |
| Main results                 | 16      | (a) Give unadjusted estimates and, if applicable, confounder-adjusted estimates and their precision (eg, 95% confidence interval). Make clear which confounders were adjusted for and why they were included | 10-13   |

|                          |    |                                                                                                                                                                            |       |
|--------------------------|----|----------------------------------------------------------------------------------------------------------------------------------------------------------------------------|-------|
|                          |    | (b) Report category boundaries when continuous variables were categorized                                                                                                  | -     |
|                          |    | (c) If relevant, consider translating estimates of relative risk into absolute risk for a meaningful time period                                                           | -     |
| Other analyses           | 17 | Report other analyses done—eg analyses of subgroups and interactions, and sensitivity analyses                                                                             | 10-13 |
| <b>Discussion</b>        |    |                                                                                                                                                                            |       |
| Key results              | 18 | Summarise key results with reference to study objectives                                                                                                                   | 14-20 |
| Limitations              | 19 | Discuss limitations of the study, taking into account sources of potential bias or imprecision. Discuss both direction and magnitude of any potential bias                 | 21    |
| Interpretation           | 20 | Give a cautious overall interpretation of results considering objectives, limitations, multiplicity of analyses, results from similar studies, and other relevant evidence | 14-20 |
| Generalisability         | 21 | Discuss the generalisability (external validity) of the study results                                                                                                      | 14-20 |
| <b>Other information</b> |    |                                                                                                                                                                            |       |
| Funding                  | 22 | Give the source of funding and the role of the funders for the present study and, if applicable, for the original study on which the present article is based              | -     |

\*Give information separately for exposed and unexposed groups.

**Note:** An Explanation and Elaboration article discusses each checklist item and gives methodological background and published examples of transparent reporting. The STROBE checklist is best used in conjunction with this article (freely available on the Web sites of PLoS Medicine at <http://www.plosmedicine.org/>, Annals of Internal Medicine at <http://www.annals.org/>, and Epidemiology at <http://www.epidem.com/>). Information on the STROBE Initiative is available at [www.strobe-statement.org](http://www.strobe-statement.org).

# BMJ Open

## Patient Safety Culture and its Determinant among Healthcare Professionals at a Cluster Hospital in Malaysia: a cross-sectional study

|                                 |                                                                                                                                                                                                                                        |
|---------------------------------|----------------------------------------------------------------------------------------------------------------------------------------------------------------------------------------------------------------------------------------|
| Journal:                        | <i>BMJ Open</i>                                                                                                                                                                                                                        |
| Manuscript ID                   | bmjopen-2021-060546.R1                                                                                                                                                                                                                 |
| Article Type:                   | Original research                                                                                                                                                                                                                      |
| Date Submitted by the Author:   | 21-May-2022                                                                                                                                                                                                                            |
| Complete List of Authors:       | Ismail, Aniza; Universiti Kebangsaan Malaysia Fakulti Perubatan, Community Health Department<br>Khalid, Siti Norhani Mazrah; Pusat Perubatan Universiti Kebangsaan Malaysia, DEPARTMENT OF COMMUNITY HEALTH; Hospital Sultanah Bahiyah |
| <b>Primary Subject Heading</b>: | Health services research                                                                                                                                                                                                               |
| Secondary Subject Heading:      | Public health, Medical management, Health services research                                                                                                                                                                            |
| Keywords:                       | Health & safety < HEALTH SERVICES ADMINISTRATION & MANAGEMENT, Quality in health care < HEALTH SERVICES ADMINISTRATION & MANAGEMENT, Clinical governance < HEALTH SERVICES ADMINISTRATION & MANAGEMENT                                 |
|                                 |                                                                                                                                                                                                                                        |

SCHOLARONE™  
Manuscripts



I, the Submitting Author has the right to grant and does grant on behalf of all authors of the Work (as defined in the below author licence), an exclusive licence and/or a non-exclusive licence for contributions from authors who are: i) UK Crown employees; ii) where BMJ has agreed a CC-BY licence shall apply, and/or iii) in accordance with the terms applicable for US Federal Government officers or employees acting as part of their official duties; on a worldwide, perpetual, irrevocable, royalty-free basis to BMJ Publishing Group Ltd ("BMJ") its licensees and where the relevant Journal is co-owned by BMJ to the co-owners of the Journal, to publish the Work in this journal and any other BMJ products and to exploit all rights, as set out in our [licence](#).

The Submitting Author accepts and understands that any supply made under these terms is made by BMJ to the Submitting Author unless you are acting as an employee on behalf of your employer or a postgraduate student of an affiliated institution which is paying any applicable article publishing charge ("APC") for Open Access articles. Where the Submitting Author wishes to make the Work available on an Open Access basis (and intends to pay the relevant APC), the terms of reuse of such Open Access shall be governed by a Creative Commons licence – details of these licences and which [Creative Commons](#) licence will apply to this Work are set out in our licence referred to above.

Other than as permitted in any relevant BMJ Author's Self Archiving Policies, I confirm this Work has not been accepted for publication elsewhere, is not being considered for publication elsewhere and does not duplicate material already published. I confirm all authors consent to publication of this Work and authorise the granting of this licence.

1  
2  
3  
4  
5  
6  
7  
8  
9  
10  
11  
12  
13  
14  
15  
16  
17  
18  
19  
20  
21  
22  
23  
24  
25  
26  
27  
28  
29  
30  
31  
32  
33  
34  
35  
36  
37  
38  
39  
40  
41  
42  
43  
44  
45  
46  
47  
48  
49  
50  
51  
52  
53  
54  
55  
56  
57  
58  
59  
60

1 **Title of Manuscript: Patient Safety Culture and its Determinant among**  
2 **Healthcare Professionals at a Cluster Hospital in Malaysia: A Cross-sectional**  
3 **Study**

4 **Corresponding author:** Aniza Ismail, Community Health Department, Faculty of  
5 Medicine, Universiti Kebangsaan Malaysia, Cheras, MY, [aniza@ppukm.ukm.edu.my](mailto:aniza@ppukm.ukm.edu.my)  
6 , 603 – 9145 5887

7 **Co-author:** Siti Norhani Mazrah Khalid, Community Health Department, Faculty of  
8 Medicine, Universiti Kebangsaan Malaysia, Cheras, MY 56000

9 **Keywords:** Patient safety, safety culture, healthcare quality improvement, attitudes

10 **Word count (excluding title page, abstract, references, and tables):** 4736

11 **Acknowledgements:** We would like to express the gratitude to the Director General  
12 of Health Malaysia for his permission to publish this article, the Hospital Directors of  
13 the hospitals; Dr. Zaiton binti Udin, Dr. Farozy Faizah Fazil and Dr. Syed  
14 Satahkatullah for the opportunities to conduct this study at their centre.



1  
2  
3  
4 **1 Manuscript Type: Original Article**

5  
6  
7 **2 Title of Manuscript: Patient Safety Culture and its Determinants among**  
8 **3 Healthcare Professionals at a Malaysian Cluster Hospital: A Cross-sectional**  
9 **4 Study**

10  
11  
12  
13  
14 **6 Abstract:**

15  
16  
17 **7 Objective:**

18 To assess the baseline level and mean score of every domain of patient-safety culture  
19 among healthcare professionals at a cluster hospital and identify the determinants  
20 associated with patient-safety culture.  
21  
22  
23  
24  
25

26  
27 **11 Methods:**

28 This cross-sectional study was conducted at a cluster hospital comprising one state  
29 and two district hospitals in Malaysia. The safety culture was assessed using the  
30 Safety Attitude Questionnaire (SAQ), which is a validated questionnaire. Using  
31 proportionate stratified random sampling, 1814 respondents were recruited, and we  
32 used the independent t-test, Pearson chi-square test, and multiple logistic regression  
33 analysis for data assessment.  
34  
35  
36  
37  
38  
39

40 **18 Results:**

41 Only 23.9% of the respondents had positive patient-safety culture levels (SAQ score  $\geq$   
42 75%); the overall mean score was  $67.82 \pm 10.53$ . The job satisfaction dimension had  
43 the highest percentage of positive responses (67.0%), with a mean score of  $76.54 \pm$   
44  $17.77$ . The factors associated with positive patient-safety culture were age (odds ratio  
45 (OR) 1.03,  $p < 0.001$ ), gender (OR 1.67,  $p = 0.001$ ), education level (OR 2.51,  $p <$   
46  $0.001$ ), work station (OR 2.02,  $p < 0.001$ ), participation in patient safety training (OR  
47 1.64,  $p = 0.007$ ), good perception of the incident reporting system (OR 1.71,  $p =$   
48  $0.038$ ), and a non-blaming (OR 1.36,  $p = 0.013$ ) and instructive (OR 3.31,  $p = 0.007$ )  
49 incident reporting system.  
50  
51  
52  
53  
54  
55  
56  
57  
58  
59  
60



## 1 **Conclusions:**

2 Healthcare professionals at the cluster hospital showed unsatisfactory patient-safety  
3 culture levels. Most of the respondents appreciated their jobs, despite experiencing  
4 dissatisfaction with their working conditions. The priority for changes should involve  
5 systematic interventions to focus on patient safety training, address the blame culture,  
6 improve communication, exchange information about errors, and improve working  
7 conditions.

8  
9 **Keywords:** Patient safety, safety culture, healthcare quality improvement, attitudes

## 10 **Strengths and limitations of this study:**

- 11 • This study reports the outcomes of patient safety culture in cluster hospitals in  
12 Malaysia.
- 13 • The study has a good response rate.
- 14 • The study covers both types of hospitals in Malaysia (specialist and non-  
15 specialist hospital).
- 16 • The respondents were from various categories of healthcare professionals.
- 17 • A combination of SAQ with qualitative methods such as peer observation,  
18 group discussions, analysis of the incident history of the organization, and  
19 audits of the safety management system is recommended to explore the main  
20 dimensions that influence patient safety culture.  
21

## 22 **BACKGROUND**

23 The healthcare system is extremely complex, wherein healthcare delivery is founded  
24 on patient safety. Patient safety entails avoiding preventable harm to patients during  
25 the health care process and reducing the risk of unnecessary injury associated with  
26  
27  
28  
29  
30  
31  
32

1 health care to an acceptable minimum. The World Health Organization (WHO)  
2 reports that approximately 1 in 10 patients are harmed while receiving health care,  
3 and approximately 43 million patient safety incidents occur annually.(1) Little can be  
4 accomplished if a patient feels, or is, unsafe when receiving medical treatment at  
5 healthcare facilities.(2) Thus, ensuring patient safety requires tremendous efforts from  
6 every member of a healthcare team.

7 The patient safety movement hit a milestone after the Institute of Medicine  
8 (IOM).(3) Since then, patient safety has been at the forefront of health care. In  
9 Malaysia, for example, the Ministry of Health (MOH) formed the Patient Safety  
10 Council of Malaysia in January 2003 to ensure that people receive safe health care.  
11 Malaysia Patient Safety Goals were then introduced on June 24, 2013, outlining 13  
12 essential areas in patient safety, with specific goals and targets. Since then, multiple  
13 programs and efforts have been organized at both national and state levels to improve  
14 the awareness of healthcare staff regarding patient safety.

15 In the interest of patient safety, numerous studies have examined the causes of  
16 medical malpractices. Over the years, health care organizations' approaches to errors  
17 have shifted from person-centered to system-centered. The system-centered approach  
18 focuses on working conditions, rather than individual mistakes.(4) Further, the WHO  
19 Patient Safety Methods and Measures Working Group identified the need to  
20 understand a range of human factors such as managerial, team, and individual  
21 characteristics that influence healthcare staff behavior concerning patient safety. A  
22 WHO report identified safety culture as one of the 10 key human factors relevant to  
23 patient safety.(5) Safety culture is defined as "the product of individual and group  
24 values, attitudes, perceptions, competencies, and patterns of behaviour that determine  
25 the commitment to, and the style and proficiency of an organisation's health and  
26 safety management. Organisations with a positive safety culture are characterised by  
27 communications founded on mutual trust, by shared perceptions of the importance of  
28 safety and by confidence in the efficacy of preventive measures". (6) It influences the  
29 typical behaviors of workers in a particular ward or unit and determines the accepted  
30 practices within an organization. Thus, evaluating the safety attitude and  
31 understanding the components and influencers of safety culture is important to  
32 develop strategies for creating a culture committed to providing patients with the  
33 safest possible care. Furthermore, reported patient-safety-related incidents have

1 increased over the years. In Malaysia, patient-safety-related incidents such as  
2 medication errors, transfusion errors, and patient falls have increased since 2014.(7)  
3 An outpatient geriatric pharmacy reported 20 cases of medication errors daily, costing  
4 approximately RM111 924 per year. This increasing trend in medical malpractices  
5 raises concern, as it indicates that our healthcare facilities may not be safe for patients.  
6 It also has the potential to lead to medico-legal repercussions, which would tarnish the  
7 reputation of the Ministry of Health Malaysia and create a financial burden on the  
8 patients and the ministry.

9 Nevertheless, there remains a lack of published investigations of the level of  
10 patient safety culture among healthcare professionals in Malaysia. Few studies were  
11 conducted to assess the perception of different categories of healthcare professionals  
12 in Malaysia, using different instruments and at a different setting (8-12). However, no  
13 study to date has assessed the patient safety culture in a cluster hospital setting in  
14 Malaysia. Therefore, it is crucial to evaluate the safety culture level among healthcare  
15 professionals and identify the associated factors.

16 The present study was conducted at a cluster hospital in the state of Kedah,  
17 Malaysia. A cluster hospital is defined as a group of hospitals in the same  
18 geographical location within a state that collaborate and operate as one organization;  
19 it is an MOH Malaysia initiative aimed at transforming healthcare service delivery in  
20 the country. Additionally, it has been recognized as a Government Transformation  
21 Program, a high-impact initiative by the Public Service Department, and one of the  
22 top 10 priorities of the MOH Plan of Action (2016–2020). The objective of the cluster  
23 hospital is to optimize resource utilization. The hospitals collaborate and have an  
24 aligned flow of patients and services. A typical cluster hospital consists of a lead  
25 hospital (LH), which is usually a state hospital or major specialist hospital. Non-LHs  
26 (NLH) are typically the district non-specialist hospitals that provide specialist services  
27 based on the cluster hospital concept.

28 Thus, this study's main objective was to assess the baseline level and mean score  
29 of every domain of patient-safety culture among healthcare professionals at a cluster  
30 hospital and identify the determinants associated with patient-safety culture.

## 1 METHODS

### 2 Study design and sampling

3 This cross-sectional study was conducted at a cluster hospital consisting of a state  
4 hospital and two district hospitals in Malaysia. As all three hospitals are public  
5 hospitals, they implement similar patient-safety practices and policies. Data were  
6 collected from December 2019 to February 2020. All doctors, pharmacists, nurses,  
7 and assistant medical officers (AMO) who were involved directly with patient care  
8 processes and who had been working at the hospitals for at least four weeks were  
9 included in the study. Those who worked in management and who were on a long  
10 leave were excluded from the study. Each hospital is detailed in Table 1.

11 Table 1: Characteristic of LH and NLH

| Parameter                          | LH                         | NLH1                              | NLH2                              |
|------------------------------------|----------------------------|-----------------------------------|-----------------------------------|
| Type of hospital                   | State, specialist hospital | District, non-specialist hospital | District, non-specialist hospital |
| Number of beds                     | 1108                       | 91                                | 80                                |
| Number of healthcare professionals | 2799                       | 184                               | 159                               |

12 LH – Lead hospital  
13 NLH1 – Non lead hospital 1  
14 NLH2 – Non lead hospital 2  
15

16 The samples were selected through proportionate stratified random sampling to  
17 ensure that, throughout the population, the sample size selected from each subgroup  
18 was proportional to the size of that subgroup. The same sampling method was used to  
19 determine how many representatives from each professional category would be  
20 selected. The sample size required, which was calculated using StatCalc Epi Info 7.2,  
21 was 778, at 95% confidence interval (CI) and with 80% power. However, considering  
22 a dropout rate of 20%, the final sample size required was 934.

### 23 Measures

24 One of the ubiquitously used tools for measuring patient-safety culture in healthcare is  
25 the Safety Attitude Questionnaire (SAQ), which has been adapted for various clinical  
26 settings such as intensive care units, general inpatient settings, emergency services,  
27 operation theatres, and pharmacies. Here, we used both English and Malay versions of  
28 the SAQ. The Malay version has been validated in the Malaysian healthcare  
29 setting,(8) with good construct validity and internal consistency.(13)

1 The SAQ comprises 36 items for assessing six safety culture domains: teamwork  
2 climate (items 1–6), safety climate (items 7–13), job satisfaction (items 15–19), stress  
3 recognition (items 20–23), perceptions of management (items 24–28), and working  
4 conditions (items 29–32). Items 14 and 33–36 are not among the abovementioned  
5 scales. All items are closed-ended questions, and respondents are required to indicate  
6 their agreement level on a 5-point Likert scale ranging from 1 (disagree strongly) to 5  
7 (agree strongly). The respondents' demographic information such as age, gender,  
8 race, profession, education level, current working hospital and unit, length of service,  
9 and working hours per week were obtained as well. Information on patient safety  
10 training and the incident reporting system in the organization was also added to the  
11 questionnaire to assess the factors affecting patient-safety culture levels among  
12 healthcare professionals. The questionnaire was distributed physically to the  
13 respondents during respondents continues medical education (CME) session. One of  
14 the researchers worked in one of the hospitals and was in charge of the other two  
15 hospitals.

16 Data were analyzed using SPSS 21, and the respondents' demographic  
17 characteristics and patient-safety culture level were determined using univariate  
18 analysis. Before the analysis, three negatively worded items (items 2, 11, and 36) in  
19 the SAQ were reversed. Each item's score was calculated by converting the 5-point  
20 Likert scale into a 100-point scale: 1 = 0, 2 = 25, 3 = 50, 4 = 75, and 5 = 100. Each  
21 item's score within the same dimension was summed and divided by the number of  
22 items available for that dimension to obtain a score of 0–100. If a respondent's mean  
23 score was  $\geq 75$ , they had a positive safety culture for a given dimension. The  
24 respondent's overall score for the patient-safety culture level was calculated using the  
25 same method.

26 The differences between two independent groups of normally distributed numerical  
27 data were analyzed using an independent t-test and the association between two sets  
28 of categorical data was examined using Pearson's chi-square test for independence.  
29 Multiple logistic regression was used to examine the association between risk factors  
30 and two outcome categories. All probability values were 2-sided, and a level of  
31 significance of  $< 0.05$  ( $p < 0.05$ ) was considered as statistically significant. Finally, the  
32 model fitness was tested using the Hosmer-Lemeshow test and classification table.

33

## 1 Ethical issues/statement

2 This study received ethics approval from the Universiti Kebangsaan Malaysia (UKM)  
3 Ethics Committee and the MOH Medical Research Etiquette Committee (MREC).  
4 Respondents were informed about the background and aim of the study and the  
5 confidentiality of the data submitted in the questionnaire, and their consent was  
6 obtained prior to answering the questionnaire.

## 8 Patient and Public Involvement

9 Patients or the public were not involved in the design, or conduct, or reporting, or  
10 dissemination plans of our research.

## 11 RESULTS

12 After 2000 questionnaires were distributed to the healthcare professionals who met  
13 the inclusion criteria, 1814 completed questionnaires were returned, resulting in an  
14 overall response rate of 90.7%.

## 15 Descriptive analysis

### 16 Demographic Characteristics

17 Table 2 shows the respondents' general demographic characteristics. Most  
18 respondents were female and Malay, with a mean age of 34.29 years. The majority  
19 were from the non-doctor group, diploma holders and had been working at their  
20 current departments or units for approximately five years. Most respondents (95.6%)  
21 agreed that patient safety training was available at their organization, and 81% had  
22 attended such programs at least once. More than half the respondents felt that the  
23 incident reporting system was punitive.

24 Table 2: Respondents' characteristics and patient safety activities

| Demographic characteristics |             | Overall              |      |
|-----------------------------|-------------|----------------------|------|
|                             |             | (n=1800)             | %    |
| Age; mean (SD), median      |             | 34.29 (7.223), 33.00 |      |
| Gender                      | Male        | 373                  | 20.7 |
|                             | Female      | 1427                 | 79.3 |
| Race                        | Malay       | 1567                 | 87.1 |
|                             | Non-Malay   | 233                  | 12.9 |
| Profession                  | Doctor      | 479                  | 26.6 |
|                             | Non-doctors | 1321                 | 73.4 |
| Education level             | Diploma     | 1189                 | 66.1 |

|                                                                                       |                   |                 |       |
|---------------------------------------------------------------------------------------|-------------------|-----------------|-------|
|                                                                                       | Degree and above  | 611             | 33.9  |
| Current working hospital                                                              |                   |                 |       |
|                                                                                       | Lead Hospital     | 1532            | 85.1  |
|                                                                                       | Non-Lead Hospital | 268             | 14.9  |
| Location of work/ department                                                          |                   |                 |       |
|                                                                                       | Medical based     | 549             | 30.5  |
|                                                                                       | Surgical based    | 589             | 32.7  |
|                                                                                       | Others            | 662             | 36.8  |
| Length of service; mean (SD), median                                                  |                   | 63.65 (61.266), | 48.00 |
| Working hours per week                                                                |                   |                 |       |
|                                                                                       | ≤ 48 hours        | 1258            | 69.9  |
|                                                                                       | > 48 hours        | 542             | 30.1  |
| Availability of training on patient safety                                            |                   |                 |       |
|                                                                                       | Yes               | 1720            | 95.6  |
|                                                                                       | No                | 80              | 4.4   |
| Participation in patient safety program or training                                   |                   |                 |       |
|                                                                                       | Yes               | 1458            | 81    |
|                                                                                       | No                | 342             | 19    |
| The overall perception of the incident reporting system                               |                   |                 |       |
|                                                                                       | Good              | 1619            | 89.9  |
|                                                                                       | Poor              | 181             | 10.1  |
| The incident reporting system is punitive                                             |                   |                 |       |
|                                                                                       | Yes               | 1128            | 62.7  |
|                                                                                       | No                | 672             | 37.3  |
| Learned something from the incidence reported (Instructive incident reporting system) |                   |                 |       |
|                                                                                       | Yes               | 1707            | 94.8  |
|                                                                                       | No                | 93              | 5.2   |
| Will report patient safety incidents to the higher authority                          |                   |                 |       |
|                                                                                       | Yes               | 1750            | 97.2  |
|                                                                                       | No                | 50              | 2.8   |

N= frequency, %= percentage

## Patient Safety Culture Score

The patient-safety culture scores among the respondents are shown in Table 3. Overall, less than a quarter of the respondents (23.9%) had a positive patient-safety culture. Notably, more than half the respondents had a negative attitude for most of the dimensions tested, except for job satisfaction. NLH respondents had a higher percentage of positive responses for the overall patient safety culture, compared to LH respondents.

Table 3: Patient safety culture levels among healthcare professionals

| Patient Safety Culture Score by domain | Overall  |      | LH       |      | NLH     |      |
|----------------------------------------|----------|------|----------|------|---------|------|
|                                        | (n=1800) | %    | (n=1532) | %    | (n=268) | %    |
| Teamwork Climate                       |          |      |          |      |         |      |
| Negative                               | 1133     | 62.9 | 975      | 63.6 | 158     | 59.0 |
| Positive                               | 667      | 37.1 | 557      | 36.4 | 110     | 41.0 |
| Safety Climate                         |          |      |          |      |         |      |
| Negative                               | 1149     | 63.8 | 1000     | 65.3 | 149     | 55.6 |
| Positive                               | 651      | 36.2 | 532      | 34.7 | 119     | 44.4 |
| Job Satisfaction                       |          |      |          |      |         |      |



|  |                           |      |      |      |      |     |      |
|--|---------------------------|------|------|------|------|-----|------|
|  | Negative                  | 594  | 33.0 | 518  | 33.8 | 76  | 28.4 |
|  | Positive                  | 1206 | 67.0 | 1014 | 66.2 | 192 | 71.6 |
|  | Stress Recognition        |      |      |      |      |     |      |
|  | Negative                  | 1049 | 58.3 | 864  | 56.4 | 185 | 69.0 |
|  | Positive                  | 751  | 41.7 | 668  | 43.6 | 83  | 31.0 |
|  | Perceptions of Management |      |      |      |      |     |      |
|  | Negative                  | 1279 | 71.1 | 1099 | 71.7 | 180 | 67.2 |
|  | Positive                  | 521  | 28.9 | 433  | 28.3 | 88  | 32.8 |
|  | Working Conditions        |      |      |      |      |     |      |
|  | Negative                  | 1389 | 77.2 | 1165 | 76.0 | 224 | 83.6 |
|  | Positive                  | 411  | 22.8 | 367  | 24.0 | 44  | 16.4 |
|  | Overall Safety Culture    |      |      |      |      |     |      |
|  | Negative                  | 1370 | 76.1 | 1179 | 77.0 | 191 | 71.3 |
|  | Positive                  | 430  | 23.9 | 353  | 23.0 | 77  | 28.7 |

1 N= frequency, %= percentage

2 LH – Lead hospital

3 NLH – Non lead hospital

4  
5 The mean scores for each patient-safety culture dimension are presented in Table  
6 4. The cluster hospital's overall mean score was 67.82, and the LH and NLH had  
7 comparable mean scores. The job satisfaction dimension had the highest mean score  
8 (76.54), followed by safety climate (69.36), teamwork climate (69.18), perception of  
9 management (64.87), stress recognition (62.80), and working condition (62.27). The  
10 NLH had higher mean scores than the LH for most dimensions, except stress  
11 recognition and working condition.

12  
13 Table 4: Mean scores of patient safety culture by dimension  
14

| Patient Safety<br>Culture<br>Domains | Overall          |                                      | LH               |                                   | NLH              |                                   |
|--------------------------------------|------------------|--------------------------------------|------------------|-----------------------------------|------------------|-----------------------------------|
|                                      | Mean (SD)        | Positive<br>response<br>(≥75)<br>(%) | Mean<br>(SD)     | Positive<br>response<br>(≥75) (%) | Mean<br>(SD)     | Positive<br>response<br>(≥75) (%) |
| Teamwork<br>climate                  | 69.18<br>(12.83) | 37.1                                 | 69.03<br>(12.84) | 36.4                              | 70.08<br>(12.75) | 41.0                              |
| Safety climate                       | 69.36<br>(12.55) | 36.2                                 | 69.03<br>(12.42) | 34.7                              | 71.25<br>(13.17) | 44.4                              |
| Job satisfaction                     | 76.54<br>(17.77) | 67.0                                 | 76.27<br>(17.90) | 66.2                              | 78.10<br>(16.96) | 71.6                              |
| Stress recognition                   | 62.80<br>(24.68) | 41.7                                 | 63.70<br>(24.41) | 43.6                              | 57.65<br>(25.58) | 31.0                              |
| Perception of<br>management          | 64.87<br>(16.24) | 28.9                                 | 64.68<br>(16.26) | 28.3                              | 65.93<br>(16.13) | 32.8                              |
| Working<br>condition                 | 62.27<br>(12.64) | 22.8                                 | 62.57<br>(12.73) | 24.0                              | 60.56<br>(11.97) | 16.4                              |
| Overall safety<br>culture            | 67.82<br>(10.53) | 23.9                                 | 67.80<br>(10.53) | 23.0                              | 67.90<br>(10.54) | 28.7                              |



## 1 Bivariate Analysis

2 Table 5 shows the result of the analysis to determine the associated factors for the  
3 patient safety culture among healthcare professionals in a cluster hospital. Overall, a  
4 significant association was noted between patient safety culture level and race ( $p =$   
5  $0.004$ ), profession ( $p < 0.05$ ), education level ( $p < 0.001$ ), current working hospital ( $p$   
6  $= 0.044$ ), current department or unit ( $p < 0.001$ ), and working hours per week ( $p =$   
7  $0.0001$ ). There was also a significant association between patient safety culture score  
8 and patient safety-related questions.

10 Table 5: Factors associated with patient safety culture

| Variable                                            | Patient safety culture |                   |                 |
|-----------------------------------------------------|------------------------|-------------------|-----------------|
|                                                     | Negative<br>n (%)      | Positive<br>n (%) | <i>p</i> -value |
| Age: Median (IQR)                                   | 32.00 (10.0)           | 35.00 (11.0)      | < 0.05          |
| Gender                                              |                        |                   |                 |
| Male                                                | 281 (75.3)             | 92 (24.7)         | 0.693           |
| Female                                              | 1089 (76.3)            | 338 (23.7)        |                 |
| Race                                                |                        |                   |                 |
| Malay                                               | 1175 (75.0)            | 392 (25.0)        | 0.004           |
| Non-Malay                                           | 195 (83.7)             | 38 (16.3)         |                 |
| Profession                                          |                        |                   |                 |
| Doctor                                              | 405 (84.6)             | 74 (15.4)         | < 0.05          |
| Non-doctors                                         | 965 (73.1)             | 356 (26.9)        |                 |
| Education level                                     |                        |                   |                 |
| Diploma                                             | 843 (70.9)             | 346 (29.1)        | < 0.001         |
| Degree and above                                    | 527 (86.3)             | 84 (13.7)         |                 |
| Current working hospital                            |                        |                   |                 |
| LH                                                  | 1179 (77.0)            | 353 (23.0)        | 0.044           |
| NLH                                                 | 191 (71.3)             | 77 (28.7)         |                 |
| Location of work/ department                        |                        |                   |                 |
| Medical                                             | 406 (74.0)             | 143 (26.0)        | < 0.001         |
| Surgical                                            | 411 (69.8)             | 178 (30.2)        |                 |
| Others                                              | 553 (83.5)             | 109 (16.5)        |                 |
| Length of service; Median (IQR)                     | 48.00 (85.0)           | 50.50 (91.0)      | 0.069           |
| Working hours per week                              |                        |                   |                 |
| ≤ 48 hours                                          | 926 (73.6)             | 332 (26.4)        | 0.0001          |
| > 48 hours                                          | 444 (81.9)             | 98 (18.1)         |                 |
| Availability of training on patient safety          |                        |                   |                 |
| Yes                                                 | 1296 (75.3)            | 424 (24.7)        | 0.0004          |
| No                                                  | 74 (92.5)              | 6 (7.5)           |                 |
| Participation in patient safety program or training |                        |                   |                 |
| Yes                                                 | 1074 (73.7)            | 384 (26.3)        | < 0.05          |
| No                                                  | 296 (86.5)             | 46 (13.5)         |                 |

|                                                                                       |      |             |            |        |
|---------------------------------------------------------------------------------------|------|-------------|------------|--------|
| The overall perception of the incident reporting system                               |      |             |            |        |
|                                                                                       | Good | 1209 (74.7) | 410 (25.3) | < 0.05 |
|                                                                                       | Poor | 161 (89.0)  | 20 (11.0)  |        |
| The incident reporting system is punitive                                             |      |             |            |        |
|                                                                                       | Yes  | 862 (76.4)  | 266 (23.6) | 0.692  |
|                                                                                       | No   | 508 (75.6)  | 164 (24.4) |        |
| Learned something from the incidence reported (Instructive incident reporting system) |      |             |            |        |
|                                                                                       | Yes  | 1283 (75.2) | 424 (24.8) | 0.0001 |
|                                                                                       | No   | 87 (93.5)   | 6 (6.5)    |        |
| Will report patient safety incidents to the higher authority                          |      |             |            |        |
|                                                                                       | Yes  | 1325 (75.7) | 425 (24.3) | 0.019  |
|                                                                                       | No   | 45 (90.0)   | 5 (10.0)   |        |

## 1 Multivariate analysis

2 Multiple logistic regression was conducted to identify a model of the predictive  
 3 factors associated with a positive patient-safety culture (Table 6). The factors included  
 4 in the model and that were significantly associated with positive patient-safety culture  
 5 were age, gender, education level, working department/unit, participation in patient  
 6 safety training, good perception of incident reporting and learning systems, and non-  
 7 blaming and instructive incident reporting systems in the organization. The model  
 8 fitness was tested using the Hosmer-Lemeshow test ( $p = 0.788$ ) and the classification  
 9 table (76.5%). Nagelkerke's  $R^2$  showed that this logistic model explained 11.4% of  
 10 the variation in the outcome variable.

11 Table 6: Multiple logistic regression  
 12  
 13

| Variable                     | Overall safety culture |         |              |         |
|------------------------------|------------------------|---------|--------------|---------|
|                              | Wald                   | Adj. OR | (95% CI)     | p-value |
| Age; median (IQR)            | 13.046                 | 1.03    | (1.02, 1.05) | < 0.001 |
| Gender                       |                        |         |              | 0.001   |
| Male                         | 11.896                 | 1.67    | (1.25, 2.24) |         |
| Female                       |                        | 1.00    |              |         |
| Education level              |                        |         |              | < 0.001 |
| Diploma                      | 35.547                 | 2.51    | (1.85, 3.34) |         |
| Degree and above             |                        | 1.00    |              |         |
| Location of work/ department |                        |         |              | < 0.001 |
| Medical based                | 7.136                  | 1.49    | (1.11, 2.00) |         |
| Surgical based               | 23.059                 | 2.02    | (1.51, 2.68) |         |
| Others                       |                        | 1.00    |              |         |

|                                                                                          |       |      |              |       |
|------------------------------------------------------------------------------------------|-------|------|--------------|-------|
| Participation in patient safety program or training                                      |       |      |              | 0.007 |
| Yes                                                                                      | 7.321 | 1.64 | (1.15, 2.34) |       |
| No                                                                                       |       | 1.00 |              |       |
| The overall perception of the incident reporting system                                  |       |      |              | 0.038 |
| Good                                                                                     | 4.303 | 1.71 | (1.03, 2.83) |       |
| Poor                                                                                     |       | 1.00 |              |       |
| The incident reporting system is punitive                                                |       |      |              | 0.013 |
| Yes                                                                                      |       | 1.00 |              |       |
| No                                                                                       | 6.107 | 1.36 | (1.07, 1.73) |       |
| Learned something from the incidence reported<br>(Instructive incident reporting system) |       |      |              | 0.007 |
| Yes                                                                                      | 7.405 | 3.31 | (1.40, 7.85) |       |
| No                                                                                       |       | 1.00 |              |       |

## DISCUSSION

The response rate of the present study is 90.7%; thus, it is considered good and positive compared with that of previous local studies that used the same instrument, which was 58.0–83%.<sup>(8, 11, 12, 14)</sup> Further, other local studies have used tools other than the SAQ, and recorded lower response rates (i.e. 78–81%), compared to that of the present study.<sup>(15, 16)</sup> Furthermore, the response rate in our study was higher compared to international benchmarking data in the US, UK, and New Zealand, which was 65.7–72.2%,<sup>(17)</sup> and other studies conducted across the world.<sup>(18-21)</sup> The greater response rate in our study may be potentially because this is the first study on patient safety conducted in our cluster hospital community; therefore, most departments were interested in participating. The high response rate could also be an obvious indication of employee commitment and dedication to quality issues, all of which signify responsible conduct. Further, the administered questionnaire has positive features, which makes it more user-friendly, compared to other tools. Among those features are self-administered questionnaires with clear terms and limited number of items that only require a short time for respondents to complete.

At our cluster hospital, the respondents lacked a patient safety culture, far below the international benchmarking standard, which is appropriately 60%,<sup>(17)</sup> and that of other previous international studies.<sup>(18, 22-26)</sup> However, compared to previous local studies, we recorded a higher percentage of positive responses than Sarifulnizam et al. (2019) and comparable responses to Samsuri et al. (2015). We noted that the NLH

1 had a greater proportion of respondents with a positive patient-safety culture. This  
2 finding correlates with Samsuri et al. (2015), who found that respondents in smaller  
3 institutions had a more positive safety culture than those working in hospitals. Other  
4 studies have also stated that smaller institutions tend to have a better safety culture  
5 compared to large institutions.(27) The reason could be that small institutions, such as  
6 NLH, have more similar environments and smaller work communities, whereby  
7 workers are more likely to hold and share the same climate. Only the job satisfaction  
8 dimension had a high percentage of positive responses (>60%), similar to other  
9 previous local studies.(11, 12) The other five dimensions showed low positive  
10 responses, between 22% and 41%.

11 In the present study, the overall mean score was slightly higher than that of a study  
12 conducted among pharmacists in Melaka (67.82 versus 65.6). Five out of six  
13 dimensions had higher mean scores compared to those recorded by Samsuri et al.  
14 (2015); in increasing score order, they were working condition (62.27 versus 54.8),  
15 perception of management (64.87 versus 62.20), teamwork climate (69.18 versus  
16 67.6), safety climate (69.36 versus 66.8), and job satisfaction (76.54 versus 67.3).  
17 Compared with international benchmarking data, safety climate, job satisfaction,  
18 perception of management, and working condition dimensions had higher mean  
19 scores, while the teamwork climate mean score was comparable to the benchmarking  
20 data.(17)

21 In the study, the stress recognition dimension had a lower mean score compared to  
22 international benchmarking data by Sexton et al. (2006) (62.80 versus 65.90), other  
23 international studies,(17, 23, 24) and the local research by Samsuri et al. (2015). The  
24 stress recognition dimension is defined as an acknowledgement of how stressors  
25 influence performance; a lower score means that the surveyed staff members have  
26 relatively low recognition of the performance consequences of stress and fatigue. This  
27 sense of invulnerability can also be observed in several other professions such as in  
28 the aviation industry, and appears to be more prevalent in healthcare settings.(28, 29)  
29 Our results showing that medical workers do not fully understand the impact of stress  
30 and exhaustion mirror the findings of others,(10, 19) as they are too accustomed to  
31 busy work schedules and heavy workloads. Therefore, staff members should admit  
32 that stress, high workload, and sleep deprivation are among the causes of reduced job  
33 performance and increased risk of medical malpractices.

1  
2  
3  
4  
5  
6  
7  
8  
9  
10  
11  
12  
13  
14  
15  
16  
17  
18  
19  
20  
21  
22  
23  
24  
25  
26  
27  
28  
29  
30  
31  
32  
33  
34  
35  
36  
37  
38  
39  
40  
41  
42  
43  
44  
45  
46  
47  
48  
49  
50  
51  
52  
53  
54  
55  
56  
57  
58  
59  
60

1 Although higher than the international benchmarking scores, the mean score of the  
2 working condition dimension reported in our study was the lowest among the six  
3 dimensions examined. This finding is similar to that of some studies.(8, 12, 23, 28)  
4 The mean score and positive response rate were lowest in the NLH, compared to the  
5 LH. This finding reflects employees' frustration with work environment quality and  
6 logistic support such as staffing and equipment. Further analysis of the items under  
7 this dimension revealed that most respondents from both the LH and NLH disagreed  
8 with the statement "the level of staffing in this clinical area is sufficient to handle the  
9 number of patients." This finding is expected from respondents in the LH, which is a  
10 state tertiary hospital with a high workload. However, the NLH respondents also  
11 indicated insufficient levels of staffing at their hospitals. This observation may be  
12 because although the NLH is a non-specialist district hospital, the workload has risen  
13 following the extension of specialist services to the NLH after the cluster hospital  
14 model was introduced; however, the number of staff remained the same. Lack of staff,  
15 increased patient volume, expansion of clinical services, and higher expectations from  
16 other healthcare professionals may have contributed to the increased workload, which  
17 could jeopardize patient safety.

18 The job satisfaction dimension had the highest positive response rate among all  
19 dimensions in the SAQ, despite most staff being dissatisfied with their working  
20 conditions. Our finding is congruent with that of local studies conducted at a teaching  
21 hospital and at public hospitals.(11, 12) Here, 67.0% of the respondents had a positive  
22 response (score > 75%) for this dimension, which is higher than that reported in local  
23 studies (8, 11) as well as international benchmarking data,(17, 30) wherein the  
24 positive response rate was 46.2–62.7%. Our finding is also consistent with other  
25 previous studies.(19, 24) Job satisfaction positivity indicates that most of the cluster  
26 hospital staff, especially the NLH staff, are relatively pleased with their jobs and that  
27 they have positive work experiences. This finding is based on the high percentage of  
28 participants who answered positively for the item "I like my job" (82.6%), the highest  
29 scored item in the SAQ. The value of job satisfaction cannot be overlooked because it  
30 is imperative that it increases workers' enthusiasm and enhances work efficiency and  
31 quality, indirectly improving patient safety. Those with higher job satisfaction would  
32 more likely be actively involved in accepting and implementing future quality-  
33 enhancement strategies.

1  
2  
3 1 Our study also reveals that teamwork climate and safety climate had the second  
4 highest mean scores after the job satisfaction dimension, with 37.1% and 36.2%  
5 2  
6 3 positive responses, respectively, which is similar to other studies.(8, 10, 17, 31) Two  
7 4  
8 5 items scored lowest under these dimensions: The respondents perceived difficulty in  
9 6  
10 7 reporting problems with patient care, and it was also difficult to discuss errors in their  
11 8  
12 9 clinical area, indicating that the existing culture in that area was unreliable and  
13 10  
14 11 discouraging toward a patient safety culture and incident reporting. Experts state that  
15 12  
16 13 the influence of teamwork should not be underestimated.(32) Many studies have  
17 14  
18 15 shown that teamwork can dramatically enhance patient outcomes and reduce  
19 16  
20 17 preventable errors.(33, 34) In the current dynamic medical climate, healthcare  
21 18  
22 19 professionals have recognized the value of knowledge and complementary skills.  
23 20  
24 21 However, mutual confidence and two-way communication capabilities between team  
25 22  
26 23 members should be strengthened. A survey also concluded that the principal  
27 24  
28 25 characteristics of a safety culture are teamwork within the unit and honest and open  
29 26  
30 27 communication among healthcare professionals and with patients.(35) Thus,  
31 28  
32 29 improvements should be made to encourage staff to communicate, particularly when  
33 30  
34 31 patient care and safety are concerned.

35 18 The predictive factors identified as significantly associated with positive patient-  
36 19  
37 20 safety culture are similar for most studies. Those working in surgery- and medical-  
38 21  
39 22 based departments were more likely to have a positive patient-safety culture, relative  
40 23  
41 24 to other categories. The findings may be linked to their working environment, which  
42 25  
43 26 may cause them to perceive safety issues differently. Other departments may not  
44 27  
45 28 consider some of these issues as relevant.(22) Those in surgery-based departments  
46 29  
47 30 deal with surgical procedures; thus, they are more susceptible to patient safety  
48 31  
49 32 concerns, as they could face medicolegal implications for an error or incident such as  
50 33  
51 34 incorrect surgery and retained foreign bodies such as gauze.

52 27 Patient safety-related training and education were identified as other important  
53 28  
54 29 factors in achieving improved patient safety.(36) This finding is congruent with a  
55 30  
56 31 study conducted in Kuwait, which found that the perception of patient safety culture  
57 32  
58 33 decreased among those who did not attend patient safety courses or lectures.(22, 37)  
59  
60 Further, healthcare professionals who did not receive any information about patient  
safety, either during their initial professional education or throughout their  
professions, had more negative attitudes to most of the dimensions of patient safety,

1 compared to those who had received the information. A study that examined the effect  
2 of training on nurses' attitudes towards patient safety found that training had a  
3 significant positive impact on nurses' safety attitudes, particularly on the perception  
4 of management, job satisfaction, and safety climate dimensions.(38) Our finding is  
5 also in line with that of other studies.(39, 40)

6 Consequently, we may conclude that patient safety education is vital in healthcare  
7 professionals' patient safety attitudes. Organizational learning and continuous  
8 development such as staff training are reported as strengths due to the capacity of  
9 healthcare organizations to create a knowledge-enhancing environment for learning.  
10 Realizing the importance of training, the MOH Patient Safety Unit has incorporated a  
11 patient safety-training module for house officers during their orientation programs  
12 before they begin their graduate training. The course, which is inspired by the WHO  
13 Multi-professional Curriculum Guide, is intended to provide house officers with  
14 relevant exposure and information to enhance patient safety. For the other healthcare  
15 professional categories, our cluster hospital has developed an initiative to conduct  
16 multiple courses regularly to ensure continuous awareness and updated patient safety  
17 knowledge.

18 Incident reporting, root causes, and risk analyses were also identified as the most  
19 critical factors for achieving positive patient safety culture. Our study shows a  
20 significant association between the incident reporting system and positive patient  
21 safety culture. The association between a non-punitive reporting system and patient  
22 safety culture is in line with most studies on patient safety factors.(36, 39-43) Most  
23 studies also mention a lower response toward non-punitive responses to error.(37, 42,  
24 44) Such findings indicate that a blame-and-shame culture in the workplace hinders  
25 accountability and causes workers to feel insecure and become prone to hiding their  
26 shortcomings, rather than sharing their concerns related to patient safety. Working in  
27 such an atmosphere would hinder learning from mistakes; individuals would only be  
28 criticized and punished, while system errors are overlooked.

29 Another study conducted in Beijing found that effective safety culture had not been  
30 achieved, as the incidents reported did not receive useful feedback, and openly  
31 discussing errors and incidents in the department was not encouraged.(19) This  
32 situation is similar to that of our study, in which 36.0% of respondents agreed that  
33 discussing errors in their clinical areas was challenging. However, most of our



1 respondents agreed that they learned from the incidents reported. This was achieved  
2 by ensuring that staff members were informed about the incidents or errors and  
3 advised on the changes implemented. The practices and guidelines for preventing  
4 errors were also reviewed appropriately. Health care organizations should use incident  
5 reporting to strengthen patient safety culture and improve service quality. This can  
6 transform an organization's existing blame culture, from one where an error is viewed  
7 as a personal failure to one where errors are considered potential areas for  
8 improvement.

9 The coronavirus disease 2019 (COVID-19) pandemic has severely affected the  
10 world since 2020, imposing extraordinary burdens and challenges on the medical  
11 system and healthcare workers worldwide. Healthcare workers have had to deal with  
12 the uncertainties of the diagnosis and management of this unknown emergent disease,  
13 unfamiliarity with new job scopes resulting from redeployment and changes in care  
14 delivery models, and increased workload, which all contribute to stress. (45) Working  
15 in such demanding conditions impairs the capacity of hospital staff to provide safe  
16 and effective treatment, magnifies weariness, and contributes to poor patient safety.  
17 (46) During this time of crisis, the quality of care for non-COVID patients was also  
18 greatly affected, mostly as the consequence of medical staff being redeployed to  
19 attend to the rapid surge of COVID-19 cases. A study on the impact of the COVID-19  
20 pandemic on safety culture reported decrease SAQ scores among nurses compared to  
21 before pandemic era. (47) Incident reporting, which is one of the important factors in  
22 achieving a positive patient safety culture, was also reduced significantly during the  
23 COVID-19 pandemic. (47)

24 It is noteworthy that the multivariate analysis model developed in the present study  
25 only explained 11.4% of the variance in the positive patient safety culture  
26 (Nagelkerke  $R^2 = 0.114$ ,  $p < 0.001$ ). Our finding is similar to that of Alqattan et al.  
27 (2018), but the variance is lower than that of other studies.(40, 48) Perhaps the  $R^2$   
28 could have been increased if we had included more predicted variables in this study.  
29 Several factors in previous studies with high  $R^2$  are worth considering for inclusion in  
30 our study. The most common factor is the number of events reported by the  
31 respondents.(8, 42, 44, 48) The details regarding the implementation of an incident  
32 reporting system are also crucial.(27, 40, 48, 49) It is also beneficial to obtain input on

1 whether staff are exposed to information on patient safety during their initial  
2 education.(22)

### 3 **LIMITATIONS**

4 Few limitations were noted in this study. First, our study's data were only collected  
5 from a cluster hospital; our state has two other cluster hospitals located in the central  
6 and southern regions of Kedah. However, we consider that our study's findings  
7 provide a reasonably representative view of the patient safety culture that can be  
8 expected in the other two cluster hospitals in Kedah, as their settings were identical to  
9 those in our cluster. Another drawback is that we did not explore the connection  
10 between patient safety culture and the number of events reported by respondents and  
11 the patient outcome. Further research is required to identify the complicated  
12 relationship between patient safety-culture and incident reporting system, the number  
13 of reporting, patient outcome, and how the data produced can be translated into action  
14 and learning points. The findings are crucial and can guide us in interventions and  
15 improvements to create a safe healthcare system and reduce adverse medical  
16 outcomes.

17 The use of a questionnaire to evaluate safety culture or a particular safety  
18 environment plays an essential role in planning the evaluation of an institution's safety  
19 culture. Although a useful tool, SAQ has its limitation; it assesses staff's beliefs  
20 regarding the safety culture, rather than their real safety behavior.(31) Notably, SAQ  
21 tests the current attitude regarding patient safety; however, there may be differences  
22 between attitudes and actual practice. Therefore, to explore the dimensions that  
23 influence patient safety in more detail, SAQ should be combined with qualitative  
24 methods such as peer observation, group discussions, analysis of organization's  
25 incident history, and audits of the safety management system.(28, 37, 50) A wide gap  
26 in research remains regarding how data obtained from different methods are related  
27 and how to combine them to get a complete safety culture view. Despite these  
28 limitations, we believe this research offers useful insight into our organizations'  
29 baseline patient safety culture.

## 1 CONCLUSIONS

2 Overall, only a minority of the healthcare professionals at our cluster hospital have a  
3 positive patient-safety culture (SAQ score  $\geq 75\%$ ), which is far below the  
4 international benchmarking standard. Attention should be paid to most of the safety  
5 culture dimensions: working condition, perception of management, safety climate,  
6 teamwork climate, and stress recognition. Although the mean scores of the  
7 dimensions were mostly higher than the international standards, no dimension reached  
8 the 75% minimum score to be recognized as an area of strength. The significant  
9 findings include employees' frustration with work environment quality and logistics,  
10 particularly staffing levels in the clinical area. There is also much room for  
11 improvement in communication regarding patient safety issues and errors, indicating  
12 that the organization's existing culture is not reliable and encouraging toward patient  
13 safety culture and incident reporting. Staff were also overly accustomed to busy work  
14 schedules and heavy workloads; thus, they did not recognize the impact of stress on  
15 their work performance and patient safety. Staff members should admit that stress,  
16 high workload, and sleep deprivation are among the causes of reduced job  
17 performance and increased risk of medical malpractices. Despite that, most  
18 respondents expressed satisfaction with their job; this presents an opportunity, as  
19 those with higher job satisfaction are more likely to be actively involved in accepting  
20 and implementing future quality-enhancement strategies.

21 Meanwhile, management commitment towards patient safety-improvement  
22 activities is vital in nurturing healthcare professionals' positive culture. Patient safety  
23 training and the incident reporting system are two critical factors that should be  
24 emphasized to improve patient safety culture. Organizations should consider and  
25 implement a non-punitive and instructive incident reporting system as an instrument  
26 that can strengthen the patient safety culture.

27  
28 **Contributorship statement:** Aniza Ismail and Siti Norhani Mazrah Khalid led the  
29 conceptualization and design of the study, Siti Norhani Mazrah Khalid conducted data  
30 collection, analysed the data and drafted the manuscript. Aniza Ismail provided  
31 intellectual input, supervised and revised the manuscript.

32 **Competing interest:** None declared.

33 **Funding:** No funding was received for the conduct of this study.

1 **Ethics approval:** This study has received approval from the Research Ethics  
2 Committee, Universiti Kebangsaan Malaysia, Medical Research Etiquette Committee  
3 (MREC), Ministry of Health (NMRR-19-2366-50240), and the Head of Cluster of  
4 Hospital Kluster Kedah Utara.

5 **Data sharing statement:** No additional data are available.  
6  
7

## 8 REFERENCES

- 9
- 10 1. Organization WH. Patient Safety 2019 [Available from:  
11 <https://www.who.int/news-room/facts-in-pictures/detail/patient-safety>.  
12
- 13 2. Ulrich B, Kear T. Patient safety and patient safety culture: foundations of  
14 excellent health care delivery. *Nephrol Nurs J*. 2014;41(5).  
15
- 16 3. Kohn LT, Corrigan J, Donaldson MS. To err is human: building a safer health  
17 system: National Academy Press Washington, DC; 2000.  
18
- 19 4. Van B, Boer F, Akerboom S, Hudson P. Patient safety: latent risk factors. *Br J*  
20 *Anaesth*. 2010;105(1):52-9.  
21
- 22 5. Organization WH. Human Factors in Patient Safety, Review of Topics and  
23 Tools World Health. 2009;2.  
24
- 25 6. Lee T. Assessment of safety culture at a nuclear reprocessing plant. *Work &*  
26 *Stress*. 1998;12(3):217-37.  
27
- 28 7. Bakar NAA, Bakar AMA, Nahar N. M.P.S.G Malaysian Patient Safety Goals  
29 annual report 2017. Kementerian Kesihatan Malaysia; 2017.  
30
- 31 8. Samsuri SE, Lin LP, Fahrni ML. Safety culture perceptions of pharmacists in  
32 Malaysian hospitals and health clinics: a multicentre assessment using the Safety  
33 Attitudes Questionnaire. *BMJ open*. 2015;5(11):e008889.  
34
- 35 9. Alex RK, Chin Z, Sharlyn P, Priscilla B, Josephine S. Hospital survey on  
36 patient safety culture in Sarawak General Hospital: a cross-sectional study. *The*  
37 *Medical Journal of Malaysia*. 2019;74(5):385-8.  
38
- 39 10. Zulkipli NW, Taib IA, Samsuddin N, Isa MLM. Patient safety culture attitudes  
40 among different healthcare professionals in selected general and district hospitals: a  
41 preliminary study. *Human Factors and Ergonomics Journal*. 2018;3(2):30-4.  
42
- 43 11. Ismail A, Hamid SBSA, Sulong S. Assessment on perception of safety attitude  
44 among medical personnel at public hospitals in Malaysia. *Journal of Health Science*  
45 *and Medical Research*. 2020;38.  
46
- 47 12. Sarifulnizam FA, Wen LK, Rozaimie ANA, Sheng TR, Mustapha NK, Ismail  
48 A. Safety attitude assessment among healthcare personnel in a teaching hospital.  
49 *Journal of Medical and Health*. 2019;14.  
50
- 51 13. Kar C, Hamid H, editors. Adaptation of Safety Attitude Questionnaire (SAQ)  
52 in Malaysia healthcare setting. 10th Biennial Conference of Asian Association of  
53 Social Psychology; 2013.  
54
- 55 14. Krishnasamy K, Tan M, Zakaria M. Patient safety culture at a teaching  
56 hospital in Kuala Lumpur. *Age and Ageing*. 2019;48(Supplement\_4).  
57  
58  
59  
60

15. Alex RK, Chin Z, Sharlyn P, Priscilla B, Josephine S. Hospital survey on patient safety culture in Sarawak General Hospital: A cross sectional study. *The Medical journal of Malaysia*. 2019;74(5):385-8.
16. Ismail L, Yunus J. Assessment of patient safety culture in Malaysia hospital using Hospital Survey on Patient Safety Culture (HSOPSC) survey. *Journal of Advanced Research in Social and Behavioural Sciences*. 2015;1(1):19-31.
17. Sexton JB, Helmreich RL, Neilands TB, Rowan K, Vella K, Boyden J, et al. The Safety Attitudes Questionnaire: psychometric properties, benchmarking data, and emerging research. *BMC Health Services Research*. 2006;6(1):44.
18. Lee W-C, Wung H-Y, Liao H-H, Lo C-M, Chang F-L, Wang P-C, et al. Hospital safety culture in Taiwan: a nationwide survey using Chinese version Safety Attitude Questionnaire. *BMC Health Services Research*. 2010;10(1):234.
19. Cui Y, Xi X, Zhang J, Feng J, Deng X, Li A, et al. The safety attitudes questionnaire in Chinese: psychometric properties and benchmarking data of the safety culture in Beijing hospitals. *BMC Health Services Research*. 2017;17(1):590.
20. Zakari NM. Attitude of academic ambulatory nurses toward patient safety culture in Saudi Arabia. *Life Science Journal*. 2011;8(3):230-7.
21. Patel S, Wu AW. Safety culture in Indian hospitals: A cultural adaptation of the safety attitudes questionnaire. *Journal of Patient Safety*. 2016;12(2):75-81.
22. Brasaite I, Kaunonen M, Martinkenas A, Suominen T. Health care professionals' attitudes regarding patient safety: cross-sectional survey. *BMC Research Notes*. 2016;9(1):177.
23. Cheng H-C, Yen AM-F, Lee Y-H. Factors affecting patient safety culture among dental healthcare workers: a nationwide cross-sectional survey. *Journal of Dental Sciences*. 2019.
24. Elsous A, Akbari Sari A, Rashidian A, Aljeesh Y, Radwan M, AbuZaydeh H. A cross-sectional study to assess the patient safety culture in the Palestinian hospitals: a baseline assessment for quality improvement. *Journal of the Royal Society of Medicine open*. 2016;7(12):2054270416675235.
25. Zimmermann N, Küng K, Sereika SM, Engberg S, Sexton B, Schwendimann R. Assessing the safety attitudes questionnaire (SAQ), German language version in Swiss university hospitals-a validation study. *BMC Health Services Research*. 2013;13(1):347.
26. Titi MA, Baksh MM, Zubairi B, Abdalla RAM, Alsaif FA, Amer YS, et al. Staying ahead of the curve: avigating changes and maintaining gains in patient safety culture-a mixed-methods study. *BMJ open*. 2021;11(3):e044116.
27. El-Jardali F, Dimassi H, Jamal D, Jaafar M, Hemadeh N. Predictors and outcomes of patient safety culture in hospitals. *BMC Health Services Research*. 2011;11(1):45.
28. Poley MJ, van der Starre C, van den Bos A, van Dijk M, Tibboel D. Patient safety culture in a Dutch pediatric surgical intensive care unit: an evaluation using the Safety Attitudes Questionnaire. *Pediatric Critical Care Medicine*. 2011;12(6):e310-e6.
29. Sexton JB, Thomas EJ, Helmreich RL. Error, stress, and teamwork in medicine and aviation: cross sectional surveys. *BMJ*. 2000;320(7237):745-9.
30. Kang S, Ho TTT, Lee N-J. Comparative studies on patient safety culture to strengthen health systems among Southeast Asian countries. *Frontiers in public health*. 2021;8:600216.
31. Alqahtani AS, Evley R. Application of Safety Attitudes Questionnaire (SAQ) in adult intensive care units: a cross-sectional study. *medRxiv*. 2020.



- 1  
2  
3 1 32. Nieva V, Sorra J. Safety culture assessment: a tool for improving patient  
4 2 safety in healthcare organizations. *BMJ Quality & Safety*. 2003;12(suppl 2):ii17-ii23.  
5 3 33. Walton M, Woodward H, Van Staaldunin S, Lemer C, Greaves F, Noble D,  
6 4 et al. The WHO patient safety curriculum guide for medical schools. *BMJ Quality &*  
7 5 *Safety*. 2010;19(6):542-6.  
8 6 34. Lo L. Teamwork and communication in healthcare: A literature review.  
9 7 Canadian Patient Safety Institute. 2011.  
10 8 35. Abdou HA, Saber KM. A baseline assessment of patient safety culture among  
11 9 nurses at student university hospital. *World Journal of Medical Sciences*.  
12 10 2011;6(1):17-26.  
13 11 36. Nygren M, Roback K, Öhrn A, Rutberg H, Rahmqvist M, Nilsen P. Factors  
14 12 influencing patient safety in Sweden: perceptions of patient safety officers in the  
15 13 county councils. *BMC Health Services Research*. 2013;13(1):52.  
16 14 37. Alqattan H, Cleland J, Morrison Z. An evaluation of patient safety culture in a  
17 15 secondary care setting in Kuwait. *Journal of Taibah University Medical Sciences*.  
18 16 2018;13(3):272-80.  
19 17 38. Azimi L, Tabibi SJ, Maleki MR, Nasiripour AA, Mahmoodi M. Influence of  
20 18 training on patient safety culture: a nurse attitude improvement perspective.  
21 19 *International Journal of Hospital Research*. 2012;1:51-6.  
22 20 39. Ridelberg M, Roback K, Nilsen P. Facilitators and barriers influencing patient  
23 21 safety in Swedish hospitals: a qualitative study of nurses' perceptions. *BMC Nursing*.  
24 22 2014;13(1):23.  
25 23 40. Wami SD, Demssie AF, Wassie MM, Ahmed AN. Patient safety culture and  
26 24 associated factors: A quantitative and qualitative study of healthcare workers' view in  
27 25 Jimma zone Hospitals, Southwest Ethiopia. *BMC Health Services Research*.  
28 26 2016;16(1):495.  
29 27 41. Gaal S, Verstappen W, Wensing M. What do primary care physicians and  
30 28 researchers consider the most important patient safety improvement strategies? *BMC*  
31 29 *Health Services Research*. 2011;11(1):102.  
32 30 42. Mahrous MS. Patient safety culture as a quality indicator for a safe health  
33 31 system: experience from Almadinah Almunawwarah, KSA. *Journal of Taibah*  
34 32 *University Medical Sciences*. 2018;13(4):377-83.  
35 33 43. Tear MJ, Reader TW, Shorrock S, Kirwan B. Safety culture and power:  
36 34 Interactions between perceptions of safety culture, organisational hierarchy, and  
37 35 national culture. *Safety Science*. 2020;121:550-61.  
38 36 44. Alswat K, Abdalla RAM, Titi MA, Bakash M, Mehmood F, Zubairi B, et al.  
39 37 Improving patient safety culture in Saudi Arabia (2012–2015): trending, improvement  
40 38 and benchmarking. *BMC Health Services Research*. 2017;17(1):516.  
41 39 45. Chen HY, Lu L, Ko YM, Chueh JW, Hsiao SY, Wang PC, et al. Post-  
42 40 Pandemic Patient Safety Culture: A Case from a Large Metropolitan Hospital Group  
43 41 in Taiwan. *International Journal of Environmental Research and Public Health*.  
44 42 2021;18(9):4537.  
45 43 46. Jha A, Prasopa-Plaizier N, Larizgoitia Ia, Bates D. Patient safety research: an  
46 44 overview of the global evidence. *BMJ Quality & Safety*. 2010;19(1):42-7.  
47 45 47. Denning M, Goh ET, Scott A, Martin G, Markar S, Flott K, et al. What has  
48 46 been the impact of COVID-19 on safety culture? A case study from a large  
49 47 metropolitan healthcare trust. *International journal of environmental research and*  
50 48 *public health*. 2020;17(19):7034.

1  
2  
3  
4  
5  
6  
7  
8  
9  
10  
11  
12  
13  
14  
15  
16  
17  
18  
19  
20  
21  
22  
23  
24  
25  
26  
27  
28  
29  
30  
31  
32  
33  
34  
35  
36  
37  
38  
39  
40  
41  
42  
43  
44  
45  
46  
47  
48  
49  
50  
51  
52  
53  
54  
55  
56  
57  
58  
59  
60

1 48. Kumbi M, Hussen A, Abate Lette SN, Morka G. Patient safety culture and  
2 associated factors among health care providers in bale zone hospitals, Southeast  
3 Ethiopia: An institutional based cross-sectional study. *Drug, Healthcare and Patient*  
4 *Safety*. 2020;12:1.  
5 49. Albalawi A, Kidd L, Cowey E. Factors contributing to the patient safety  
6 culture in Saudi Arabia: a systematic review. *BMJ open*. 2020;10(10):e037875.  
7 50. Hays DG, Singh AA. *Qualitative inquiry in clinical and educational settings*:  
8 Guilford Press; 2011.  
9

For peer review only



STROBE Statement—Checklist of items that should be included in reports of *cross-sectional studies*

|                              | Item No | Recommendation                                                                                                                                                                                               | Page No |
|------------------------------|---------|--------------------------------------------------------------------------------------------------------------------------------------------------------------------------------------------------------------|---------|
| <b>Title and abstract</b>    | 1       | (a) Indicate the study's design with a commonly used term in the title or the abstract                                                                                                                       | 1       |
|                              |         | (b) Provide in the abstract an informative and balanced summary of what was done and what was found                                                                                                          | 1-2     |
| <b>Introduction</b>          |         |                                                                                                                                                                                                              |         |
| Background/rationale         | 2       | Explain the scientific background and rationale for the investigation being reported                                                                                                                         | 4-5     |
| Objectives                   | 3       | State specific objectives, including any prespecified hypotheses                                                                                                                                             | 5       |
| <b>Methods</b>               |         |                                                                                                                                                                                                              |         |
| Study design                 | 4       | Present key elements of study design early in the paper                                                                                                                                                      | 6       |
| Setting                      | 5       | Describe the setting, locations, and relevant dates, including periods of recruitment, exposure, follow-up, and data collection                                                                              | 6       |
| Participants                 | 6       | (a) Give the eligibility criteria, and the sources and methods of selection of participants                                                                                                                  | 6       |
| Variables                    | 7       | Clearly define all outcomes, exposures, predictors, potential confounders, and effect modifiers. Give diagnostic criteria, if applicable                                                                     | 6       |
| Data sources/<br>measurement | 8*      | For each variable of interest, give sources of data and details of methods of assessment (measurement). Describe comparability of assessment methods if there is more than one group                         | 6       |
| Bias                         | 9       | Describe any efforts to address potential sources of bias                                                                                                                                                    | 6       |
| Study size                   | 10      | Explain how the study size was arrived at                                                                                                                                                                    | 7       |
| Quantitative variables       | 11      | Explain how quantitative variables were handled in the analyses. If applicable, describe which groupings were chosen and why                                                                                 | 7       |
| Statistical methods          | 12      | (a) Describe all statistical methods, including those used to control for confounding                                                                                                                        | 8       |
|                              |         | (b) Describe any methods used to examine subgroups and interactions                                                                                                                                          | 8       |
|                              |         | (c) Explain how missing data were addressed                                                                                                                                                                  | 8       |
|                              |         | (d) If applicable, describe analytical methods taking account of sampling strategy                                                                                                                           | 8       |
|                              |         | (e) Describe any sensitivity analyses                                                                                                                                                                        | 8       |
| <b>Results</b>               |         |                                                                                                                                                                                                              |         |
| Participants                 | 13*     | (a) Report numbers of individuals at each stage of study—eg numbers potentially eligible, examined for eligibility, confirmed eligible, included in the study, completing follow-up, and analysed            | 8       |
|                              |         | (b) Give reasons for non-participation at each stage                                                                                                                                                         | -       |
|                              |         | (c) Consider use of a flow diagram                                                                                                                                                                           | -       |
| Descriptive data             | 14*     | (a) Give characteristics of study participants (eg demographic, clinical, social) and information on exposures and potential confounders                                                                     | 8-9     |
|                              |         | (b) Indicate number of participants with missing data for each variable of interest                                                                                                                          | 8-9     |
| Outcome data                 | 15*     | Report numbers of outcome events or summary measures                                                                                                                                                         | 9       |
| Main results                 | 16      | (a) Give unadjusted estimates and, if applicable, confounder-adjusted estimates and their precision (eg, 95% confidence interval). Make clear which confounders were adjusted for and why they were included | 10-13   |

|                          |    |                                                                                                                                                                            |       |
|--------------------------|----|----------------------------------------------------------------------------------------------------------------------------------------------------------------------------|-------|
|                          |    | (b) Report category boundaries when continuous variables were categorized                                                                                                  | -     |
|                          |    | (c) If relevant, consider translating estimates of relative risk into absolute risk for a meaningful time period                                                           | -     |
| Other analyses           | 17 | Report other analyses done—eg analyses of subgroups and interactions, and sensitivity analyses                                                                             | 10-13 |
| <b>Discussion</b>        |    |                                                                                                                                                                            |       |
| Key results              | 18 | Summarise key results with reference to study objectives                                                                                                                   | 14-20 |
| Limitations              | 19 | Discuss limitations of the study, taking into account sources of potential bias or imprecision. Discuss both direction and magnitude of any potential bias                 | 21    |
| Interpretation           | 20 | Give a cautious overall interpretation of results considering objectives, limitations, multiplicity of analyses, results from similar studies, and other relevant evidence | 14-20 |
| Generalisability         | 21 | Discuss the generalisability (external validity) of the study results                                                                                                      | 14-20 |
| <b>Other information</b> |    |                                                                                                                                                                            |       |
| Funding                  | 22 | Give the source of funding and the role of the funders for the present study and, if applicable, for the original study on which the present article is based              | -     |

\*Give information separately for exposed and unexposed groups.

**Note:** An Explanation and Elaboration article discusses each checklist item and gives methodological background and published examples of transparent reporting. The STROBE checklist is best used in conjunction with this article (freely available on the Web sites of PLoS Medicine at <http://www.plosmedicine.org/>, Annals of Internal Medicine at <http://www.annals.org/>, and Epidemiology at <http://www.epidem.com/>). Information on the STROBE Initiative is available at [www.strobe-statement.org](http://www.strobe-statement.org).
